# Supplementary material for: Hydrogen bonding mediated enantioselective organocatalysis in brine: significant rate acceleration and enhanced stereoselectivity in enantioselective Michael addition reactions of 1,3-dicarbonyls to β-nitroolefins
Source: Royal Society of Chemistry journal article supplement (doi:10.1039/c1cc13637b), 2011-01-01
Supplement: c1cc13637b.pdf [file c1cc13637b.pdf]

## Electronic Supplementary Information

### Hydrogen Bonding Mediated Enantioselective Organocatalysis in Brine: Significant Rate Acceleration and Enhanced Stereoselectivity in Enantioselective Michael Addition Reactions of 1,3-Dicarbonyls to $\beta$ - Nitroolefins

Han Yong Bae,<sup>a</sup> Surajit Some,<sup>a</sup> Joong Suk Oh,<sup>a</sup> Yong Seop Lee,<sup>a</sup> Choong Eui Song<sup>ab\*</sup>

<sup>a</sup> Department of Chemistry, Sungkyunkwan University, 300 Cheoncheon, Jangan, Suwon, Gyeonggi, 440-746 (Korea); Fax: (+82) 31-290-7075; E-mail: [s1673@skku.edu](mailto:s1673@skku.edu)

<sup>b</sup> Department of Energy Science, Sungkyunkwan University, 300 Cheoncheon, Jangan, Suwon, Gyeonggi, 440-746 (Korea)

1. General
2. General Procedure for the Michael Addition in Brine
3. Solvent Screening
4. Product Characterization
5. <sup>1</sup>H NMR, <sup>13</sup>C NMR and HPLC Spectra for Table 2
6. <sup>1</sup>H NMR, <sup>13</sup>C NMR and HPLC Spectra for Table 3
7. Scale-up Experiment
8. References

## 1. General

All chemicals used in this study were obtained from commercial sources and used without further purification. The organocatalysts examined in this study (**QN-TU**,<sup>1a</sup> **QN-SA**,<sup>1b</sup> **QN-SQA**,<sup>1c,1d</sup> **CN-SQA**<sup>1c</sup>) were prepared starting from the corresponding 9-*epi*-amino cinchona alkaloids according to the literature procedure. The chromatographic purification of the products was conducted by flash chromatography using Merck silica gel 60 (230–400 mesh). Thin-layer chromatography was conducted on Merck silica gel 60F plates. HPLC analyses were performed on a Varian Pro Star Series instrument equipped with an isostatic pump using a CHIRALCEL Column (250 × 4.6 mm). The <sup>1</sup>H and <sup>13</sup>C NMR spectra were recorded on Varian 300 spectrometers.

## 2. General procedure for the Michael Addition

2,4-Pentanedione (**2**, 103  $\mu$ L, 0.5 mmol) was added to a mixture of  $\beta$ -nitrostyrene (**1a**, 75 mg, 0.5 mmol), **QN-SQA** (1.6 mg, 0.5 mol%), and brine (1.5 mL of saturated NaCl aqueous solution) in a 5 mL vial. The reaction mixture was stirred vigorously (using five magnetic bars at a stirring speed of 1000 rpm) at room temperature. After completion of the reaction, which was monitored by TLC, an aqueous HCl solution (1 N, 1 mL) was added to quench the reaction then extracted with CH<sub>2</sub>Cl<sub>2</sub> (3 x 5 mL). The combined organic phase was washed with water and dried over anhydrous Na<sub>2</sub>SO<sub>4</sub>, and the solvent was concentrated. The obtained crude product was purified by column chromatography on silica gel to afford the Michael addition product **3a**.

## 3. Solvent Screening

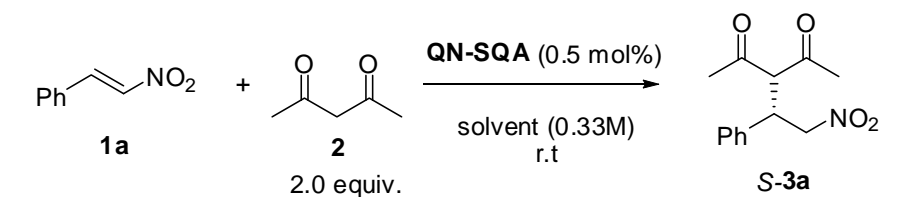

| entry | solvent                         | time (h) | conv. (%) <sup>a</sup> | ee (%) <sup>b</sup> |
|-------|---------------------------------|----------|------------------------|---------------------|
| 1     | CH <sub>2</sub> Cl <sub>2</sub> | 2        | >99                    | >99                 |
| 2     | DMSO                            | 1        | >99                    | racemic             |
| 3     | Toluene                         | 2        | >99                    | >99                 |
| 4     | MeOH                            | 96       | >99                    | >99                 |

<sup>a</sup> Determined by <sup>1</sup>H NMR. <sup>b</sup> Determined by HPLC analysis using chiral AD-H column.

#### 4. Product Characterization

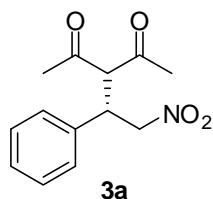

Purification by column chromatography (4 : 1 = Hexane : EtOAc) afforded **3a** as a white solid (98% yield). Analytical data was matched with previously reported values.

<sup>1</sup>H NMR (300 MHz, CDCl<sub>3</sub>, Me<sub>4</sub>Si): δ 7.26-7.19 (m, 3H), 7.12-7.10 (m, 2H), 4.58-4.55 (m, 2H), 4.30 (d, 1H, *J* = 10.5 Hz), 4.21-4.17 (m, 1H), 2.23 (s, 3H), 1.87 (s, 3H); <sup>13</sup>C NMR (75 MHz, CDCl<sub>3</sub>, Me<sub>4</sub>Si): δ 201.7, 201.0, 135.9, 129.3, 128.5, 127.9, 78.1, 70.6, 42.7, 30.4, 29.6; HPLC (AD-H, Hexane : iPrOH = 90 : 10, 1.0. mL/min, 220 nm): *t*<sub>major</sub> = 11.0 min, *t*<sub>minor</sub> = 14.7 min; >99% ee.

**Configuration assignment:** The absolute stereochemistry was assigned as (*S*) by comparison of the retention time of HPLC with the literature data.<sup>2</sup>

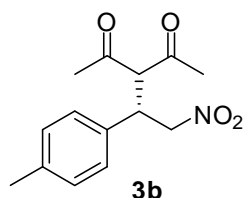

Purification by column chromatography (4 : 1 = Hexane : EtOAc) afforded **3b** as a white solid (92% yield). Analytical data was matched with previously reported values.

$^1\text{H}$  NMR (300 MHz,  $\text{CDCl}_3$ ,  $\text{Me}_4\text{Si}$ ):  $\delta$  7.20-6.97(m 4H), 4.54-4.52 (m, 2H), 4.28 (d,  $J$  = 10.8 Hz, 1H), 4.17-4.11 (m, 1H), 2.22 (s, 3H), 2.19 (s, 3H), 1.86 (s, 3H);  $^{13}\text{C}$  NMR (75 MHz,  $\text{CDCl}_3$ ,  $\text{Me}_4\text{Si}$ ):  $\delta$  201.8, 201.1, 138.2, 132.8, 129.9, 127.7, 78.2, 70.6, 42.4, 30.3, 29.5, 20.9; HPLC (AD-H, Hexane : iPrOH = 90 : 10, 1.0 mL/min, 220 nm):  $t_{\text{major}}$  = 10.2 min,  $t_{\text{minor}}$  = 16.6 min; 97% ee.

**Configuration assignment:** The absolute stereochemistry was assigned as (*S*) by comparison of the retention time of HPLC with the literature data.<sup>1c</sup>

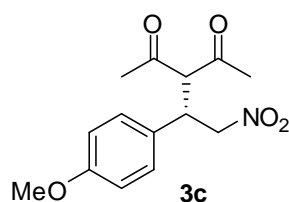

Purification by column chromatography (4 : 1 = Hexane : EtOAc) afforded **3c** as a white solid (91% yield). Analytical data was matched with previously reported values.

$^1\text{H}$  NMR (300 MHz,  $\text{CDCl}_3$ ,  $\text{Me}_4\text{Si}$ ):  $\delta$  7.03 (d,  $J$  = 8.7 Hz, 3H), 6.76 (d,  $3J$  = 8.7 Hz, 2H), 4.53-4.51 (m, 2H), 4.23 (d,  $J$  = 11.1 Hz, 1H), 4.16-4.08 (m, 1H), 3.69 (s, 3H), 2.19 (s, 3H), 1.86 (s, 3H);  $^{13}\text{C}$  NMR (75 MHz,  $\text{CDCl}_3$ ,  $\text{Me}_4\text{Si}$ ):  $\delta$  201.8, 201.1, 159.4, 129.0, 127.6, 114.6, 78.4, 70.8, 55.1, 42.1, 30.3, 29.5; HPLC (AD-H, Hexane : iPrOH = 90 : 10, 1.0 mL/min, 220 nm):  $t_{\text{major}}$  = 16.2 min,  $t_{\text{minor}}$  = 25.7 min; 98% ee.

**Configuration assignment:** The absolute stereochemistry was assigned as (*S*) by comparison of the retention time of HPLC with the literature data.<sup>3</sup>

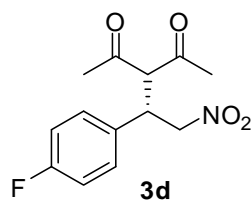

Purification by column chromatography (4 : 1 = Hexane : EtOAc) afforded **3d** as a white solid (89% yield). Analytical data was matched with previously reported values.

$^1\text{H}$  NMR (300 MHz,  $\text{CDCl}_3$ ,  $\text{Me}_4\text{Si}$ ):  $\delta$  7.13 - 7.09 (m, 2H), 6.97-6.91 (m, 2H), 4.58-4.49 (m, 2H), 4.27 (d,  $J$  = 10.8, 1H), 4.21- 4.13 (m, 1H), 2.20 (s, 3H), 1.89 (s, 3H);  $^{13}\text{C}$  NMR (75 MHz,  $\text{CDCl}_3$ ,  $\text{Me}_4\text{Si}$ ):  $\delta$  201.4, 200.7, 164.0, 160.7, 131.8, 131.7, 129.7, 129.6, 116.3, 116.0, 78.0, 70.4, 42.0, 30.3, 29.6; HPLC (OD-H, Hexane : iPrOH = 85 : 15, 1 mL/min, 220 nm):  $t_{\text{major}}$  = 16.9 min,  $t_{\text{minor}}$  = 18.8 min; >99% ee.

**Configuration assignment:** The absolute stereochemistry was assigned as (*S*) by comparison of the

retention time of HPLC with the literature data.<sup>4</sup>

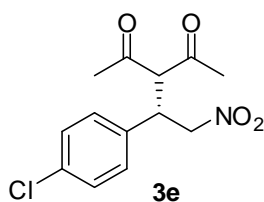

Purification by column chromatography (4 : 1 = Hexane : EtOAc) afforded **3e** as a white solid (99% yield). Analytical data was matched with previously reported values.

<sup>1</sup>H NMR (300 MHz, CDCl<sub>3</sub>, Me<sub>4</sub>Si): δ 7.23 (d, *J* = 8.4 Hz, 2H), 7.07 (d, *J* = 8.4 Hz, 2H), 4.55 (d, *J* = 6.3 Hz, 2H), 4.14 (d, *J* = 10.5 Hz, 1H), 4.20-4.12 (m, 1H), 2.20 (s, 3H), 1.90 (s, 3H); <sup>13</sup>C NMR (75 MHz, CDCl<sub>3</sub>, Me<sub>4</sub>Si): δ 201.3, 200.6, 134.5, 134.3, 129.4, 129.3, 77.8, 70.3, 42.0, 30.4, 29.7; HPLC (AS-H, Hexane : iPrOH = 85 : 15, 1 mL/min, 220 nm): *t*<sub>major</sub> = 15.2 min, *t*<sub>minor</sub> = 28.5 min; >99% ee.

**Configuration assignment:** The absolute stereochemistry was assigned as (*S*) by comparison of the retention time of HPLC with the literature data.<sup>3</sup>

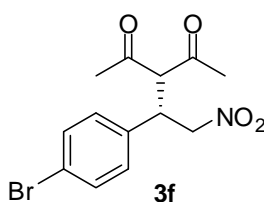

Purification by column chromatography (4 : 1 = Hexane : EtOAc) afforded **3f** as a white solid (96% yield). Analytical data was matched with previously reported values.

<sup>1</sup>H NMR (300 MHz, CDCl<sub>3</sub>, Me<sub>4</sub>Si): δ 7.46 (d, *J* = 8.4 Hz, 2H), 7.08 (d, *J* = 8.4 Hz, 2H), 4.62 (d, *J* = 6.3 Hz, 2H), 4.25 (d, *J* = 6.0 Hz, 1H), 4.26-4.18 (m, 1H), 2.29 (s, 3H), 1.98 (s, 3H); <sup>13</sup>C NMR (75 MHz, CDCl<sub>3</sub>, Me<sub>4</sub>Si): 201.3, 200.5, 135.1, 132.4, 129.6, 122.5, 77.7, 70.2, 42.1, 30.4, 29.7; HPLC (OD-H, Hexane : iPrOH = 90 : 10, 0.8 mL/min, 220 nm): *t*<sub>major</sub> = 34.2 min, *t*<sub>minor</sub> = 37.3 min; >99% ee.

**Configuration assignment:** The absolute stereochemistry was assigned as (*S*) by comparison of the retention time of HPLC with the literature data.<sup>1c</sup>

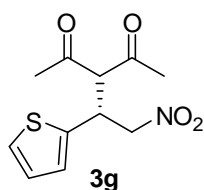

Purification by column chromatography (4:1 = Hexane : EtOAc) afforded **3g** as a white solid (91% yield). Analytical data was matched with previously reported values.

$^1\text{H}$  NMR (300 MHz,  $\text{CDCl}_3$ ,  $\text{Me}_4\text{Si}$ ):  $\delta$  7.28-7.23 (m, 1H), 6.93-6.89 (m, 2H), 4.68-4.66 (m, 2H), 4.58-4.51 (m, 1H), 4.40 (d,  $J = 9.9$  Hz, 1H), 2.29 (s, 3H), 2.07 (s, 3H);  $^{13}\text{C}$  NMR (75 MHz,  $\text{CDCl}_3$ ,  $\text{Me}_4\text{Si}$ ):  $\delta$  201.4, 200.6, 138.4, 127.3, 126.9, 125.6, 78.4, 70.9, 38.2, 30.5, 29.6; HPLC (AS-H, Hexanes : iPrOH = 90 : 10, 0.6 mL/min, 220 nm):  $t_{\text{major}} = 33.2$  min,  $t_{\text{minor}} = 41.1$  min; >99% ee.

**Configuration assignment:** The absolute stereochemistry was assigned as (*R*) by comparison of the retention time of HPLC with the literature data.<sup>5</sup>

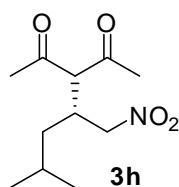

Purification by column chromatography (4 : 1 = Hexane : EtOAc) afforded **3h** as a white solid (90% yield). Analytical data was matched with previously reported values.

$^1\text{H}$  NMR (300 MHz,  $\text{CDCl}_3$ ,  $\text{Me}_4\text{Si}$ ):  $\delta$  4.56-4.51 (m, 2H), 4.00 (d,  $J = 8.4$  Hz, 1H), 2.96-2.85 (m, 1H), 2.29 (s, 3H), 2.26 (s, 3H), 1.78-1.64 (m, 1H), 1.42-1.32 (m, 1H), 1.05-0.95 (m, 1H);  $^{13}\text{C}$  NMR (75 MHz,  $\text{CDCl}_3$ ,  $\text{Me}_4\text{Si}$ ):  $\delta$  202.9, 202.2, 75.6, 69.3, 38.2, 34.7, 31.0, 29.7, 24.8, 23.1, 21.1; HPLC (OD-H, Hexane : iPrOH = 96 : 4, 0.7 mL/min, 210 nm):  $t_{\text{major}} = 17.1$  min,  $t_{\text{minor}} = 15.6$  min; >99% ee.

**Configuration assignment:** The absolute stereochemistry was assigned as (*R*) by comparison of the retention time of HPLC with the literature data.<sup>5</sup>

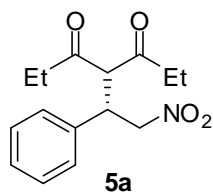

Purification by column chromatography (5 : 1 = Hexane : Acetone) afforded **5a** as a white solid (96% yield). Analytical data was matched with previously reported values.

$^1\text{H}$  NMR (300 MHz,  $\text{CDCl}_3$ ,  $\text{Me}_4\text{Si}$ ):  $\delta$  7.32-7.27 (m, 3H), 7.18-7.15 (m, 2H), 4.71-4.60 (m, 2H), 4.35-4.23 (m, 2H), 2.65-2.44 (m, 2H), 2.38-2.25 (m, 1H), 2.20-2.04 (m, 1H), 1.07 (t,  $J = 7.2$  Hz, 3H), 0.78 (t,

$J = 7.2$  Hz, 3H);  $^{13}\text{C}$  NMR (75 MHz,  $\text{CDCl}_3$ ,  $\text{Me}_4\text{Si}$ ):  $\delta$  204.4, 203.8, 136.2, 129.1, 128.3, 127.8, 77.8, 69.0, 42.9, 36.8, 36.4, 7.4, 7.2; HPLC (AD-H, Hexane : iPrOH = 90 : 10, 1.0 mL/min, 220 nm):  $t_{\text{major}} = 8.2$  min,  $t_{\text{minor}} = 11.3$  min; >99% ee.

**Configuration assignment:** The absolute stereochemistry was assigned as (*S*) by comparison of the retention time of HPLC with the literature data.<sup>2</sup>

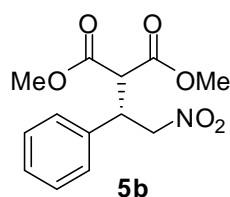

Purification by column chromatography (4 : 1 = Hexane : EtOAc) afforded **5b** as a white solid (92% yield). Analytical data was matched with previously reported values.

$^1\text{H}$  NMR (300 MHz,  $\text{CDCl}_3$ ,  $\text{Me}_4\text{Si}$ ):  $\delta$  7.33-7.21 (m, 5H), 4.96-4.83 (m, 2H), 4.24 (td,  $J = 8.8, 5.7$  Hz, 1H), 3.86 (d,  $J = 9.2$  Hz, 1H), 3.76 (s, 3H), 3.56 (s, 3H);  $^{13}\text{C}$  NMR (75 MHz,  $\text{CDCl}_3$ ,  $\text{Me}_4\text{Si}$ ):  $\delta$  167.7, 167.1, 136.1, 128.9, 128.3, 127.8, 77.4, 54.6, 52.9, 52.7, 42.9; HPLC (AD-H, Hexanes : iPrOH = 90 : 10, 1 mL/min, 220 nm):  $t_{\text{major}} = 26.4$  min,  $t_{\text{minor}} = 16.2$  min; 97 % ee.

**Configuration assignment:** The absolute stereochemistry was assigned as (*S*) by comparison of the retention time of HPLC with the literature data.<sup>2</sup>

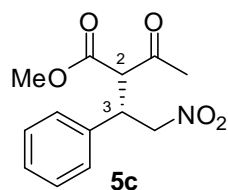

Purification by column chromatography (4 : 1 = Hexane : EtOAc) afforded **5c** as a white solid (95% yield, 1 : 1 mixture of diastereomers). Analytical data was matched with previously reported values.

$^1\text{H}$  NMR (300 MHz,  $\text{CDCl}_3$ ,  $\text{Me}_4\text{Si}$ ):  $\delta$  7.33-7.25 (m, 3H), 7.21-7.18 (m, 2H), 4.83-4.81 (m, 1 H), 4.78-4.76 (m, 1 H), 4.29-4.17 (m, 1 H), 4.12 (d,  $J = 9.6$  Hz, 0.5 H), 4.03 (d,  $J = 9.6$  Hz, 0.5 H), 3.77-3.53 (s, 3H), 2.29-2.05 (s, 3H); dr = 1 : 1 (determined by integration of  $^1\text{H}$  NMR);  $^{13}\text{C}$  NMR (75 MHz,  $\text{CDCl}_3$ ,  $\text{Me}_4\text{Si}$ ):  $\delta$  200.5, 199.6, 167.4, 166.7, 135.8, 135.6, 128.5, 128.3, 127.7, 127.6, 127.2, 127.2, 76.4, 76.0,

61.2, 60.8, 52.3, 52.1, 42.0, 41.7, 29.7, 29.6; HPLC (AD-H, Hexane : iPrOH = 95 : 5, 1.0 mL/min, 220 nm): First diastereomer:  $t_{\text{major}} = 15.4$  min,  $t_{\text{minor}} = 23.2$  min; >99% ee; Second diastereomer :  $t_{\text{major}} = 28.6$  min,  $t_{\text{minor}} = 21.7$  min; >99 % ee.

**Configuration assignment:** The absolute stereochemistry of carbon (3) was assigned as (*S*) by comparison of the retention time of HPLC with the literature data.<sup>2</sup>

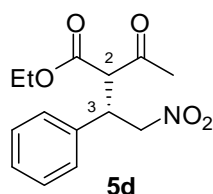

Purification by column chromatography (5 : 1 = Hexane : Acetone) afforded **5d** as a white solid. Analytical data was matched with previously reported values (94% yield, 1.5:1 mixture of diastereomers).

<sup>1</sup>H NMR (300 MHz, CDCl<sub>3</sub>, Me<sub>4</sub>Si):  $\delta$  7.32-7.27 (m, 3H), 7.22-7.19 (m, 2H), 4.89-4.76 (m, 2H), 4.26-4.18 (m, 2 H), 4.12 (d,  $J = 9.9$  Hz, 0.6H) 4.03 (d, 0.4 H,  $J = 9.9$  Hz), 3.96 (q, 1H,  $J = 7.2$  Hz), 2.30-2.05 (s, 3H), 1.28-1.00 (t,  $J = 7.2$  Hz, 4H); dr = 1.5 : 1 (determined by integration of <sup>1</sup>H NMR); <sup>13</sup>C NMR (75 MHz, CDCl<sub>3</sub>, Me<sub>4</sub>Si):  $\delta$  201.4, 200.5, 167.7, 167.1, 136.7, 129.4, 128.6, 128.5, 128.2, 128.1, 78.1, 78.0, 76.8, 65.4, 62.2, 62.2, 61.9, 42.8, 42.5, 30.5, 30.3, 13.9, 13.6; HPLC (AD-H, Hexanes : iPrOH = 95 : 5, 0.8 mL/min, 220 nm): First diastereomer :  $t_{\text{major}} = 15.6$  min,  $t_{\text{minor}} = 26.8$  min; >99% ee; Second diastereomer:  $t_{\text{major}} = 51.6$  min,  $t_{\text{minor}} = 23.5$  min; >99% ee.

**Configuration assignment:** The absolute stereochemistry of carbon (3) was assigned as (*S*) by comparison of the retention time of HPLC with the literature data.<sup>2</sup>

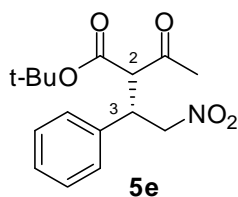

Purification by column chromatography (4 : 1 = Hexane : EtOAc) afforded **5e** as a white solid (94% yield, 4.9 : 1 mixture of diastereomers). Analytical data was matched with previously reported values.

<sup>1</sup>H NMR (300 MHz, CDCl<sub>3</sub>, Me<sub>4</sub>Si):  $\delta$  7.34-7.29 (m, 3H), 7.25-7.20 (m, 2H), 4.85-4.82 (m 0.4H), 4.77-4.65 (m, 2H), 4.23-4.10 (m, 1H), 4.03 (d,  $J = 10.2$  Hz, 0.83H), 3.92 (d,  $J = 10.2$  Hz, 0.17H), 2.30-2.06 (s, 3H), 1.47 - 1.11 (s, 9H); <sup>13</sup>C NMR (75 MHz, CDCl<sub>3</sub>, Me<sub>4</sub>Si):  $\delta$  201.5, 200.9 166.9, 166.1, 136.9, 129.3, 129.0, 128.5, 128.4, 128.4, 128.2, 83.6, 83.1, 78.6, 78.1, 63.3, 62.9, 42.8, 42.6, 30.3, 29.9, 28.0,

27.6; dr = 4.9 : 1 (determined by integration of  $^1\text{H}$  NMR); HPLC (AD-H, Hexanes : iPrOH = 95 : 5, 1 mL/min, 220 nm): First (major) diastereomer:  $t_{\text{major}} = 8.8$  min,  $t_{\text{minor}} = 13.5$  min ; 98 % ee; Second (minor) diastereomer:  $t_{\text{major}} = 24.2$  min,  $t_{\text{minor}} = 15.2$  min; 98% ee.

**Configuration assignment:** The absolute stereochemistry of carbon (3) was assigned as (*S*) by comparison of the retention time of HPLC with the literature data.<sup>2</sup>

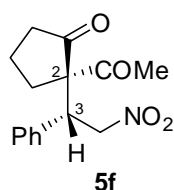

**5f**

(major diastereomer)

Purification by column chromatography (4 : 1 = Hexane : EtOAc) afforded **5f** as a white solid (85% yield, 7.3 : 1 mixture of diastereomers). Analytical data was matched with previously reported values.

$^1\text{H}$  NMR (300 MHz,  $\text{CDCl}_3$ ,  $\text{Me}_4\text{Si}$ ):  $\delta$  7.24-7.34(m, 5H), 5.01(dd,  $J = 11.1, 13.2$  Hz, 0.12H) 4.86(dd,  $J = 11.4$  Hz and  $J = 13.5$  Hz, 0.88H), 4.60-4.51 (dd,  $J = 3.9$  Hz and  $13.2$  Hz, 1H), 4.39-4.28 (dd,  $J = 3.9$  and  $J = 11.1$  Hz, 1H), 2.61-2.54 (m, 1H), 2.33 (s, 3H), 2.26-2.14(m, 1H), 2.03-1.93 (m, 1H), 1.80-1.65 (m, 3H); dr = 7.3 : 1 (determined by integration of  $^1\text{H}$  NMR);  $^{13}\text{C}$  NMR (75 MHz,  $\text{CDCl}_3$ ,  $\text{Me}_4\text{Si}$ ):  $\delta$  213.3, 203.0, 134.4, 129.7, 129.1, 128.7, 75.8, 71.4, 46.6, 38.9, 27.5, 26.8, 19.7; HPLC (OD-H, Hexane : iPrOH = 80 : 20, 1 mL/min, 220 nm): First (major) diastereomer:  $t_{\text{major}} = 13.4$  min,  $t_{\text{minor}} = 60.9$  min; 97% ee; Second (minor) diastereomer:  $t_{\text{major}} = 17.0$  min,  $t_{\text{minor}} = 27.1$  min; 75% ee.

**Configuration assignment:** The absolute stereochemistry was assigned as (2*R*,3*R*) by comparison of the retention time of HPLC with the literature data.<sup>6</sup>

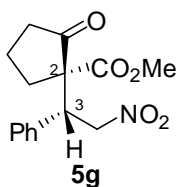

**5g**

(major diastereomer)

Purification by column chromatography (4:1 = Hexane : EtOAc) afforded **5g** as a colorless oil (87% yield, 99:1 mixture of diastereomers). Analytical data was matched with previously reported values.

$^1\text{H}$  NMR (300 MHz,  $\text{CDCl}_3$ ,  $\text{Me}_4\text{Si}$ ):  $\delta$  7.31-7.23 (m, 5H), 5.17 (dd,  $J = 4.2$  and  $13.5$  Hz, 1H), 5.01(dd,  $J = 10.8$  Hz and  $J = 13.5$ Hz, 1H), 4.08 (dd,  $J = 3.9$  Hz and  $10.8$  Hz, 1H), 3.75 (s, 3H), 2.40-2.32 (m, 2H), 2.05-1.82 (m, 4H) ; dr >99 : 1 (determined by integration of  $^1\text{H}$  NMR);  $^{13}\text{C}$  NMR (75MHz,  $\text{CDCl}_3$ ,  $\text{Me}_4\text{Si}$ ):  $\delta$  212.4, 170.0, 135.5, 129.5, 129.1, 128.5, 76.6, 62.7, 53.2, 46.4, 38.1, 31.4, 19.5; HPLC (OD-

H, Hexane : iPrOH = 80 : 20, 1 mL/min, 220 nm): First (major) diastereomer:  $t_{\text{major}} = 16.1$  min,  $t_{\text{minor}} = 26.4$  min; >99% ee; Second (minor) diastereomer:  $t_{\text{major}} = 13.5$  min,  $t_{\text{minor}} = 23.1$  min; 84% ee.

**Configuration assignment:** The absolute stereochemistry was assigned as (2*S*,3*R*) by comparison of the retention time of HPLC with the literature data.<sup>1c,6</sup>

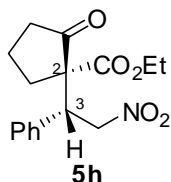

**(major diastereomer)**

Purification by column chromatography (4:1 = Hexane : EtOAc) afforded **5h** as a colorless oil (98% yield, 99:1 mixture of diastereomers). Analytical data was matched with previously reported values.

<sup>1</sup>H NMR (300 MHz, CDCl<sub>3</sub>, Me<sub>4</sub>Si):  $\delta$  7.34-7.27 (m, 5H), 5.18 (dd,  $J = 3.9$  and  $13.6$  Hz, 1H), 5.01 (dd,  $J = 10.9$  and  $13.5$  Hz, 1H), 4.24-4.17 (m, 1H), 4.08 (dd,  $J = 3.9$  and  $10.9$  Hz, 1H), 2.40-2.32 (m, 2H), 2.07-1.74 (m, 4H), 1.27 (t,  $J = 7.1$  Hz, 1H); dr >99 : 1 (determined by integration of <sup>1</sup>H NMR); <sup>13</sup>C NMR (75 MHz, CDCl<sub>3</sub>, Me<sub>4</sub>Si):  $\delta$  212.3, 169.3, 135.3, 129.3, 128.7, 128.2, 76.4, 62.4, 62.1, 46.1, 37.8, 31.1, 19.3, 13.9; HPLC (OD-H, Hexane : iPrOH = 90 : 10, 0.5 mL/min, 215 nm): First (major) diastereomer:  $t_{\text{major}} = 23.0$  min,  $t_{\text{minor}} = 33.5$  min; >99% ee ; Second (minor) diastereomer:  $t_{\text{major}} = 19.6$  min,  $t_{\text{minor}} = 29.2$  min; 78% ee.

**Configuration assignment:** The absolute stereochemistry was assigned as (2*S*,3*R*) by comparison of the retention time of HPLC with the literature data.<sup>7</sup>

## 5. <sup>1</sup>H NMR, <sup>13</sup>C NMR and HPLC Spectra for Table 2

### 3a (Entry 2, Table 2)

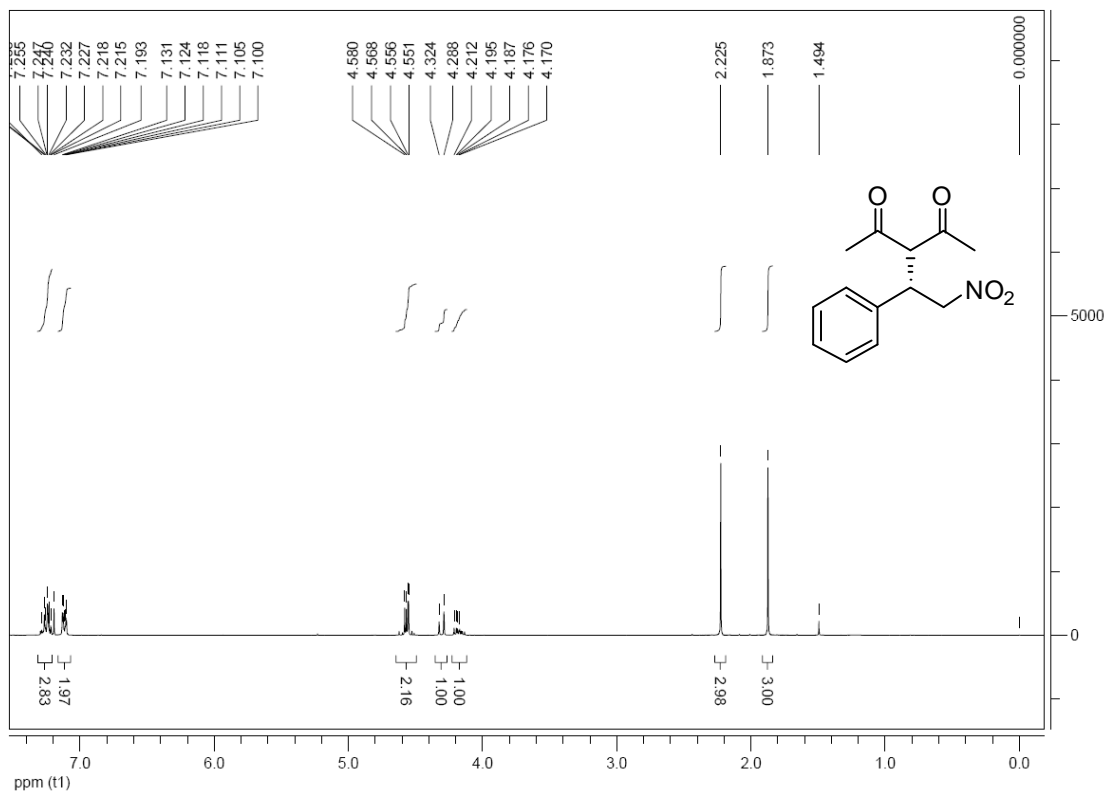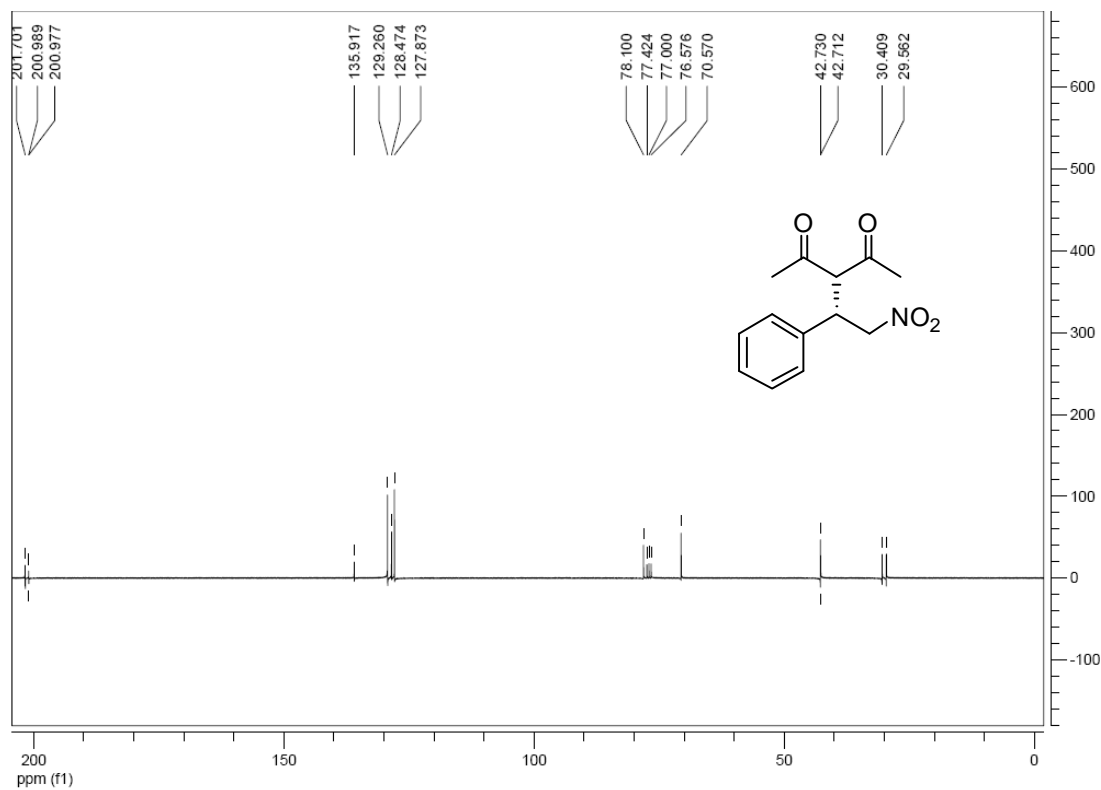

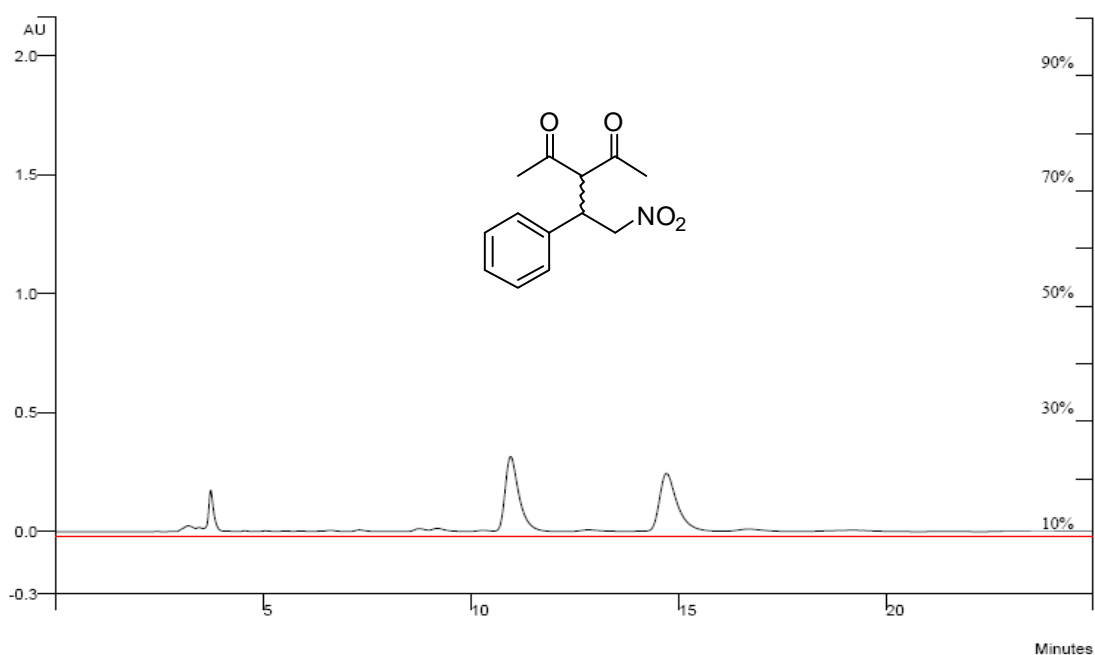

| Peak No | Peak Name | Result () | Ret. Time (min) | Time Offset (min) | Area (counts) | Rel Ret Time | Sep. Code | Width 1/2 (sec) | Status Codes | Group |
|---------|-----------|-----------|-----------------|-------------------|---------------|--------------|-----------|-----------------|--------------|-------|
| 1       |           | 50.1789   | 10.960          | 0.000             | 71975616      | 0.00         | BB        | 20.3            |              | 0     |
| 2       |           | 49.8211   | 14.716          | 0.000             | 71462376      | 0.00         | BB        | 25.8            |              | 0     |
| Totals  |           | 100.0000  |                 | 0.000             | 143437984     |              |           |                 |              |       |

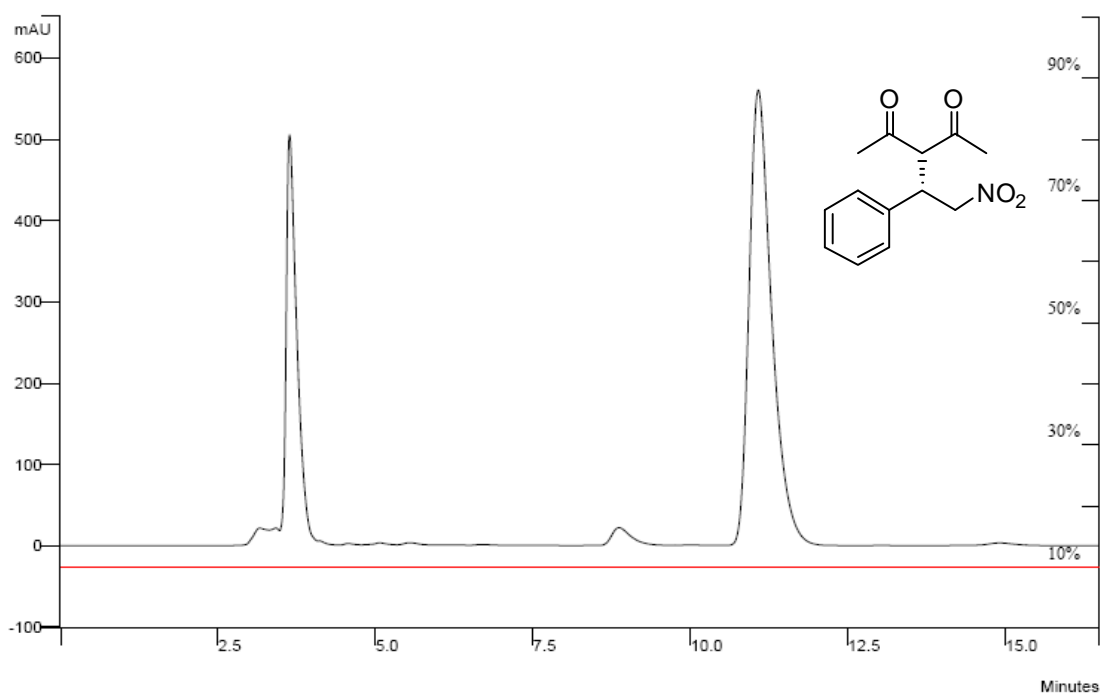

| Peak No | Peak Name | Result () | Ret. Time (min) | Time Offset (min) | Area (counts) | Rel Ret Time | Sep. Code | Width 1/2 (sec) | Status Codes | Group |
|---------|-----------|-----------|-----------------|-------------------|---------------|--------------|-----------|-----------------|--------------|-------|
| 1       |           | 99.5284   | 11.080          | 0.000             | 140049344     | 0.00         | BB        | 22.5            |              | 0     |
| 2       |           | 0.4716    | 14.913          | 0.000             | 663585        | 0.00         | BB        | 23.0            |              | 0     |
| Totals  |           | 100.0000  |                 | 0.000             | 140712928     |              |           |                 |              |       |

**3a** (using **CN-SQA**:<sup>1c</sup> 98% ee (*R*); Entry 11, Table 1)

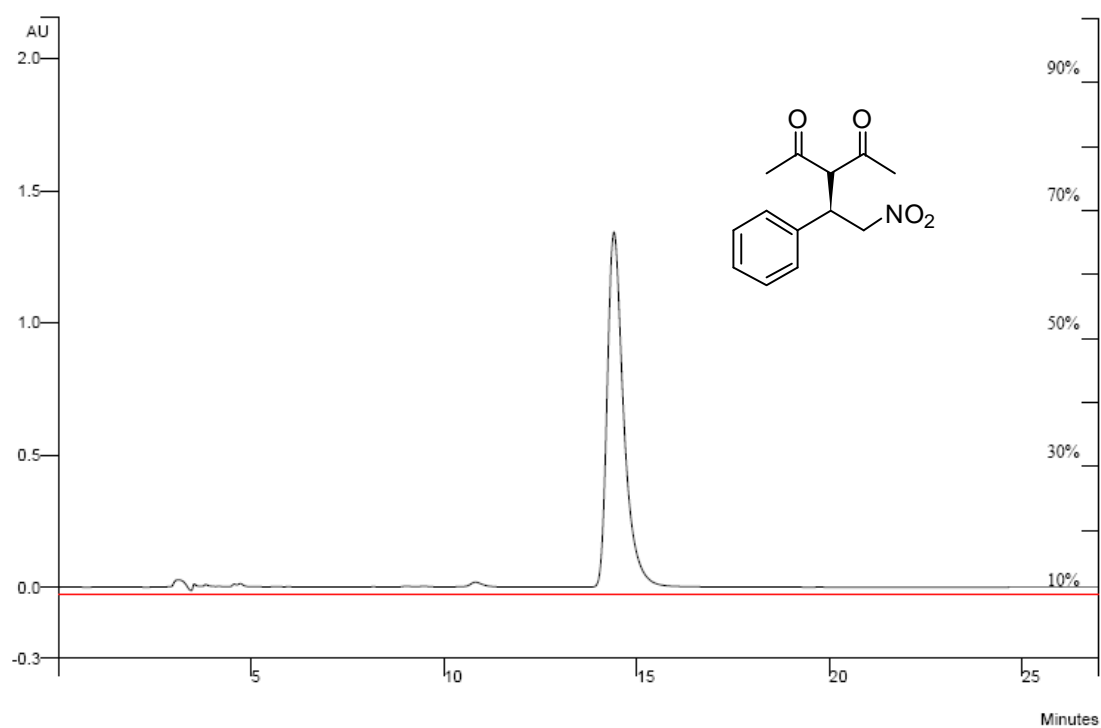

| Peak No | Peak Name | Result () | Ret. Time (min) | Time Offset (min) | Area (counts) | Rel Ret Time | Sep. Code | Width 1/2 (sec) | Status Codes | Group |
|---------|-----------|-----------|-----------------|-------------------|---------------|--------------|-----------|-----------------|--------------|-------|
| 1       |           | 1.1130    | 10.821          | 0.000             | 4499929       | 0.00         | BB        | 20.0            |              | 0     |
| 2       |           | 98.8870   | 14.416          | 0.000             | 399819680     | 0.00         | BB        | 26.1            |              | 0     |
| Totals  |           | 100.0000  |                 | 0.000             | 404319616     |              |           |                 |              |       |

**3b (Entry 4, Table 2)**

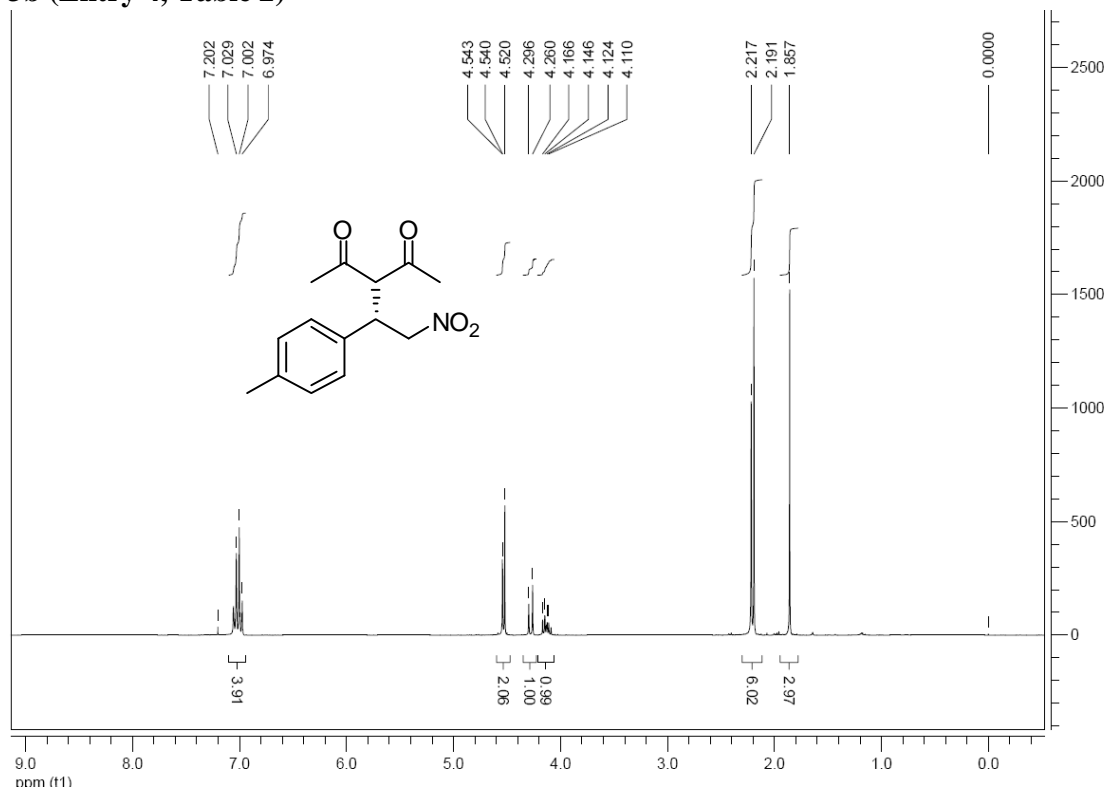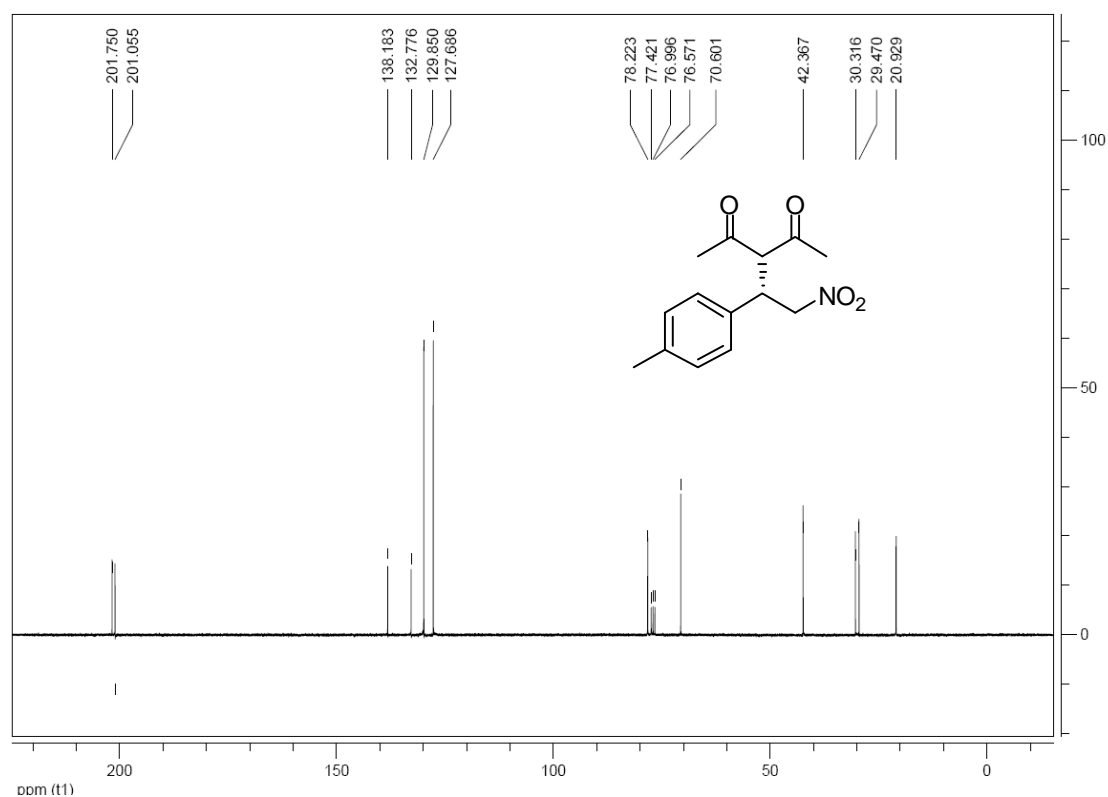

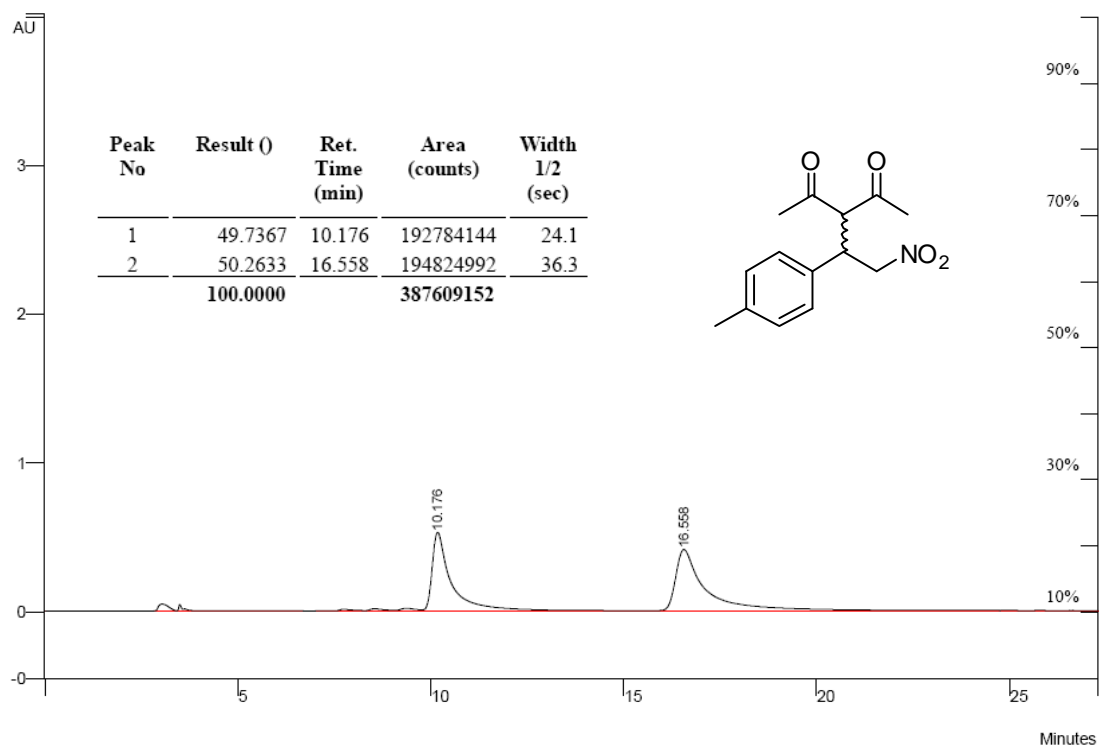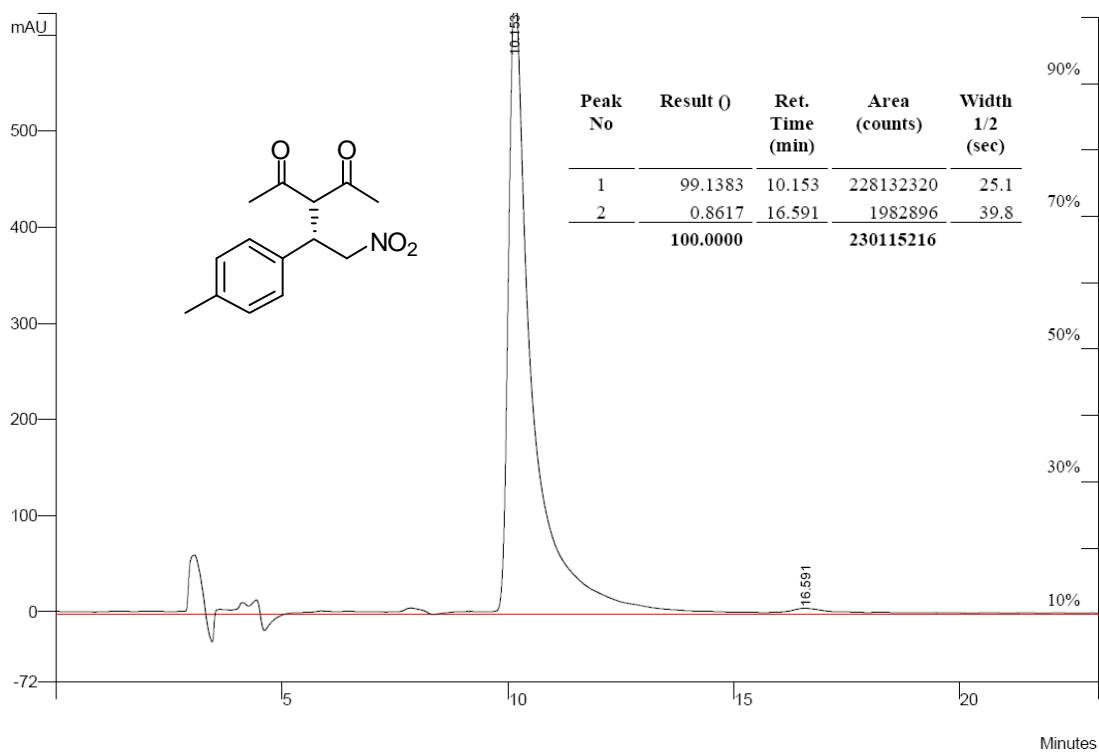

**3c ( Entry 6, Table 2)**

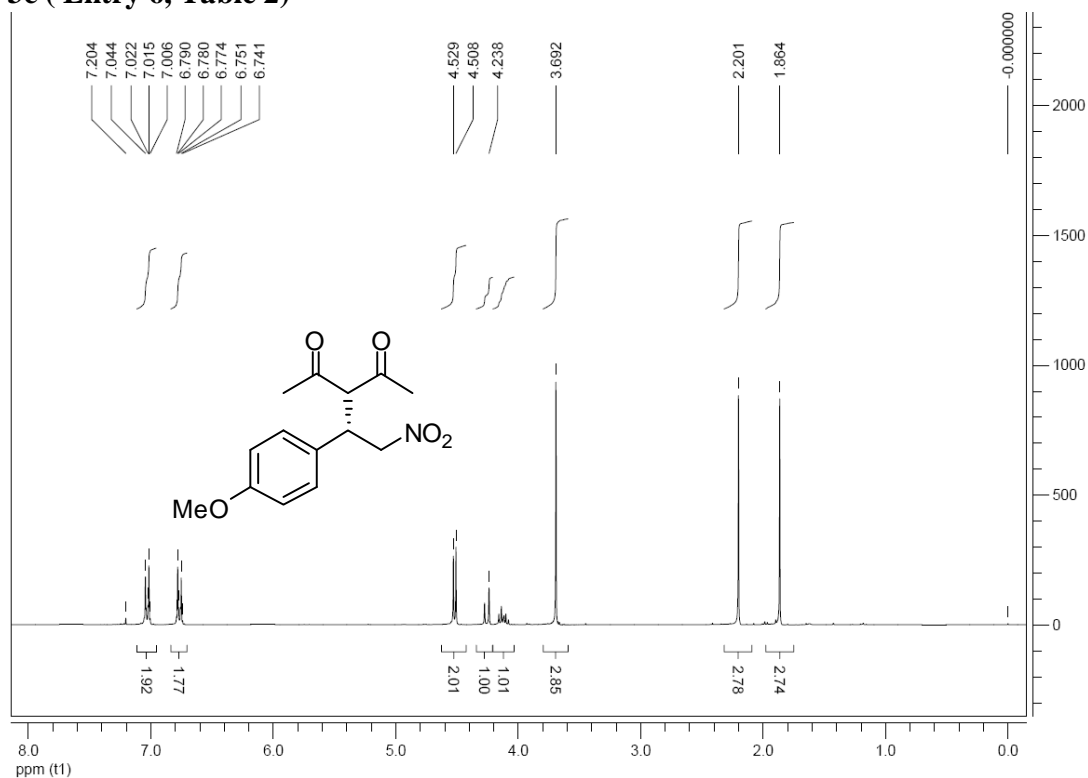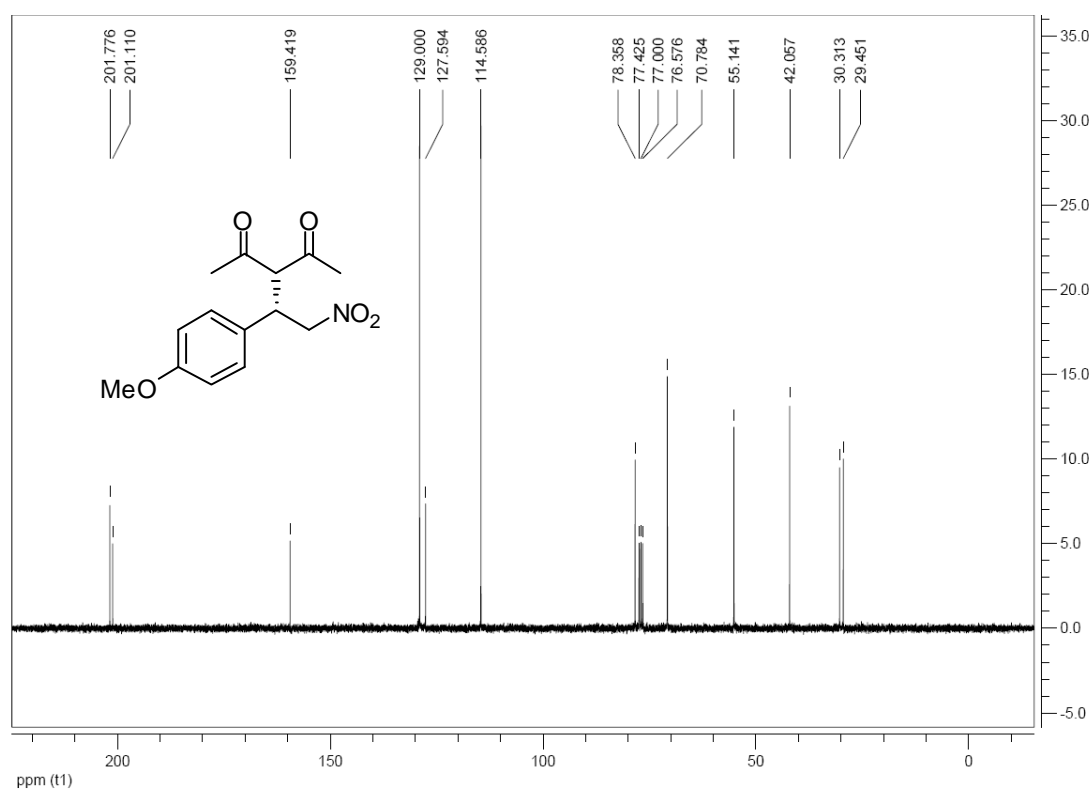

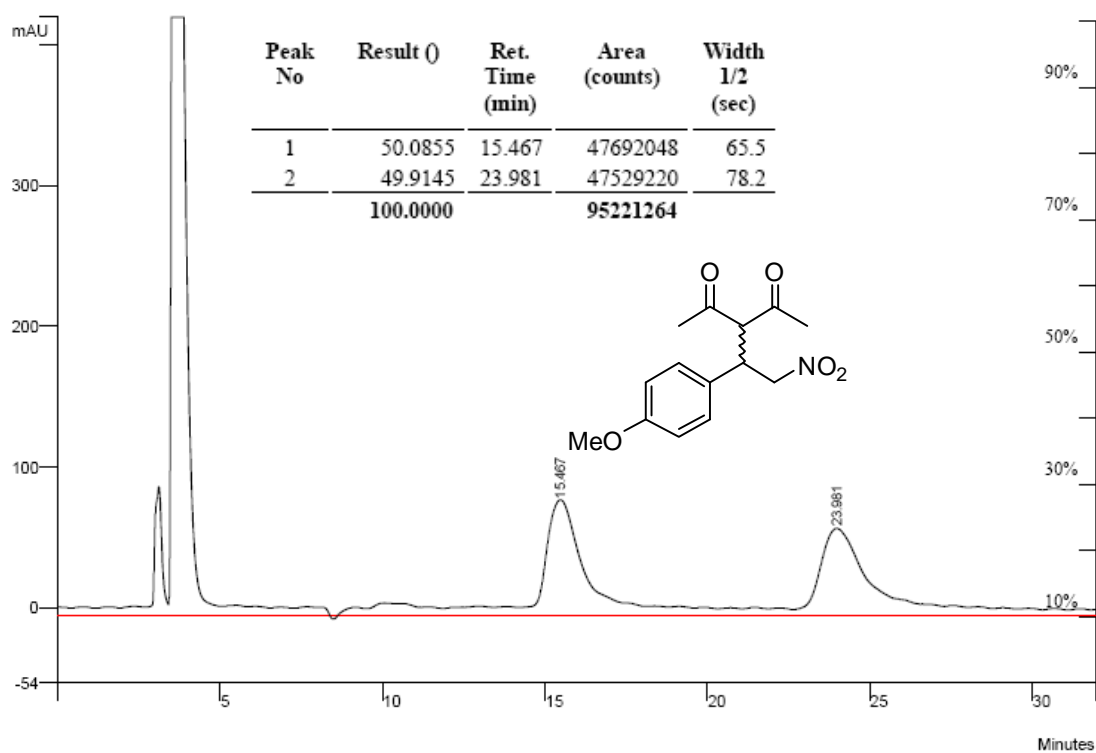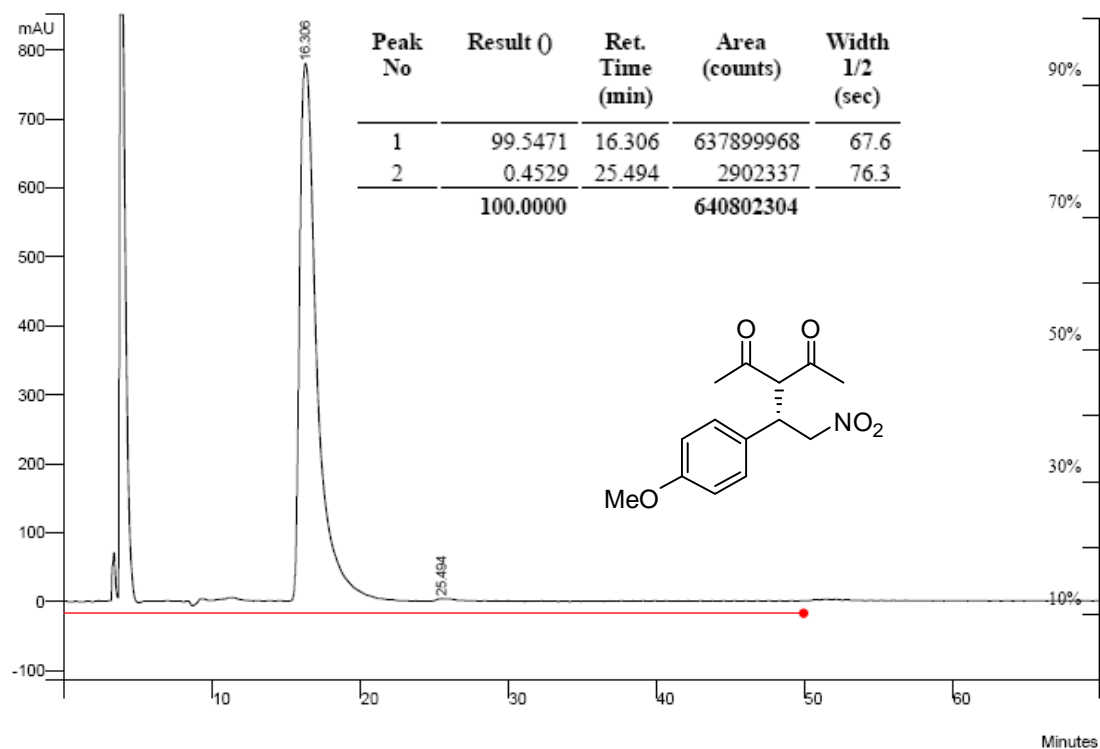

**3d (Entry 8, Table 2)**

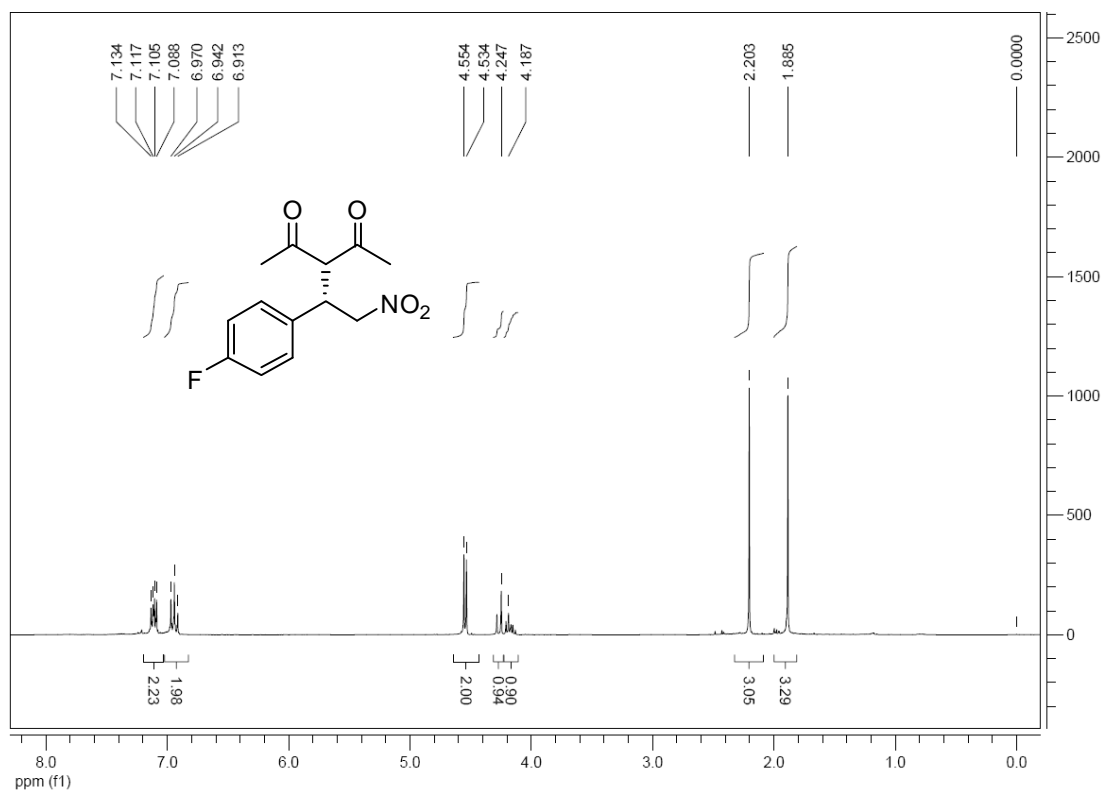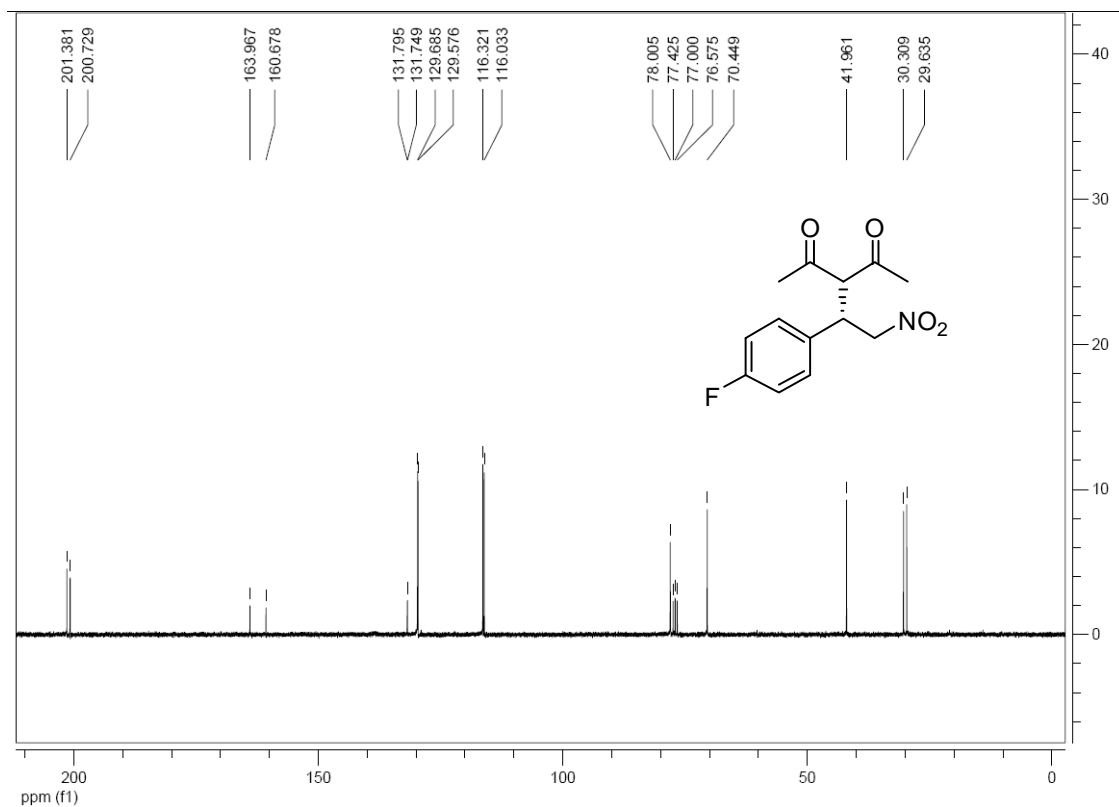

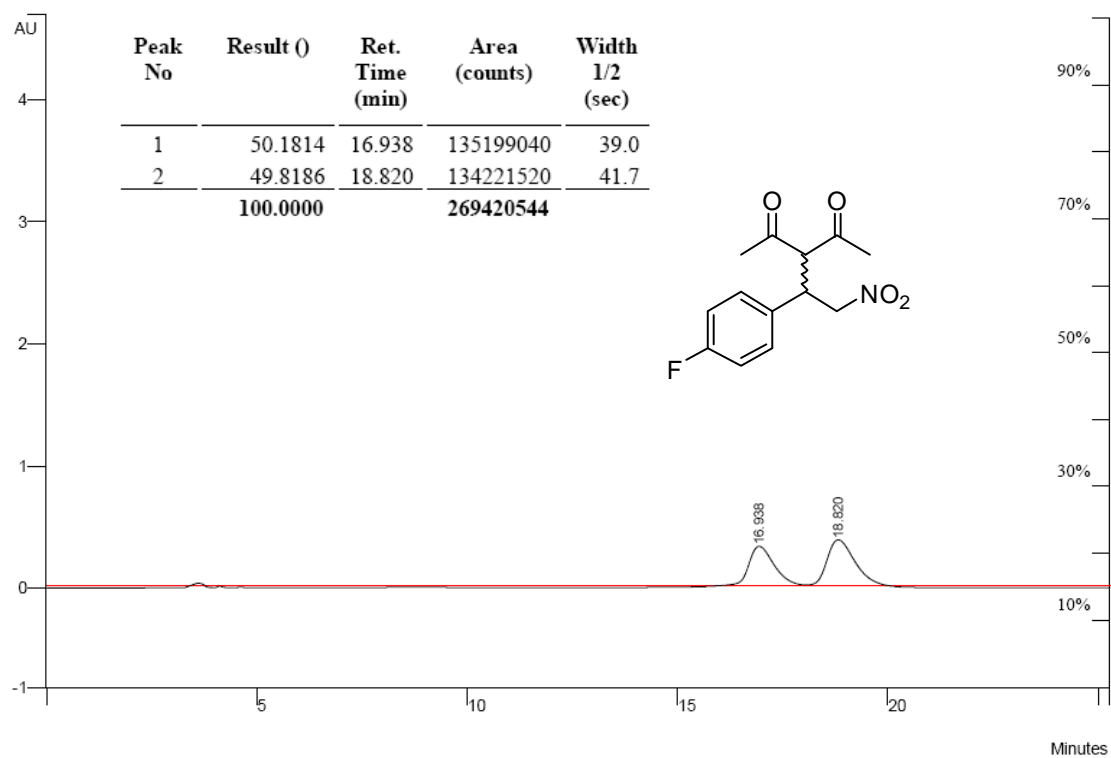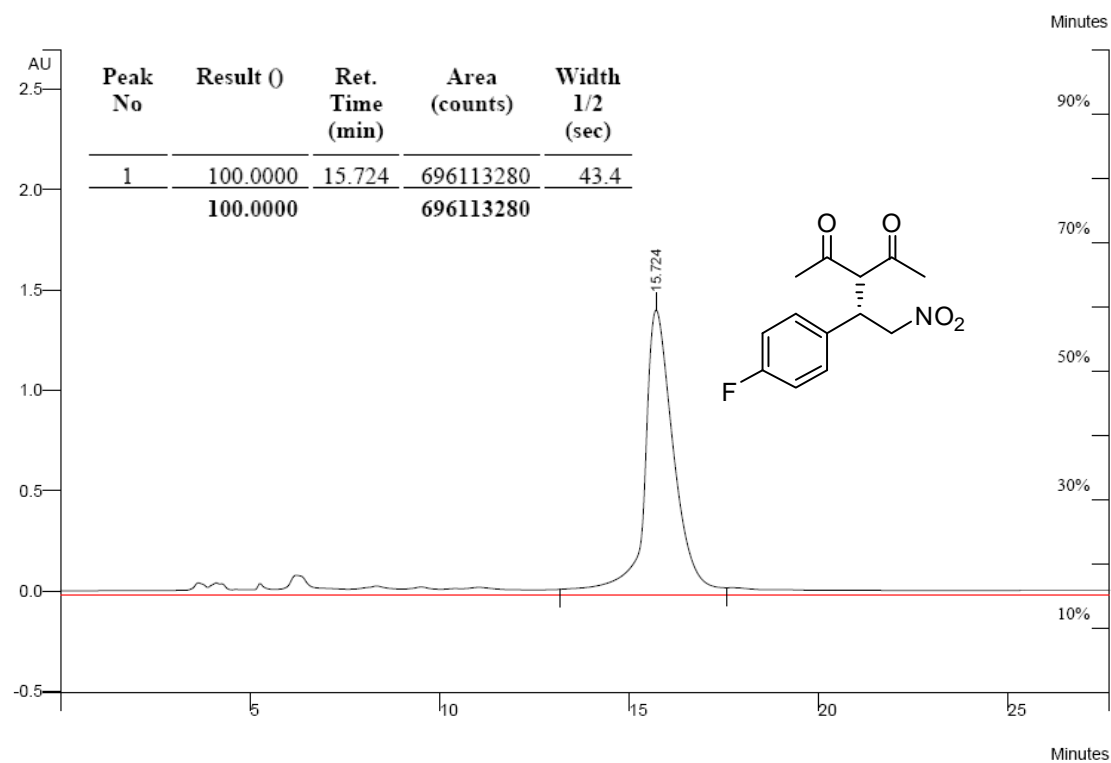

**3e (Entry 10, Table 2)**

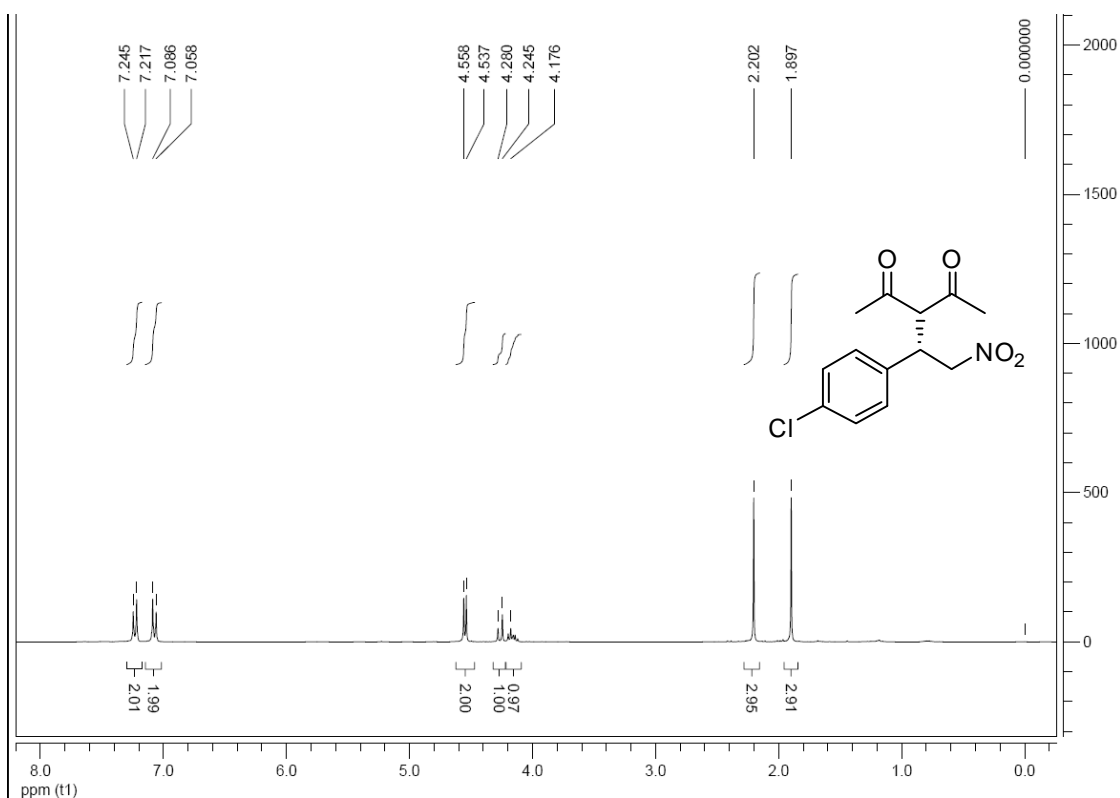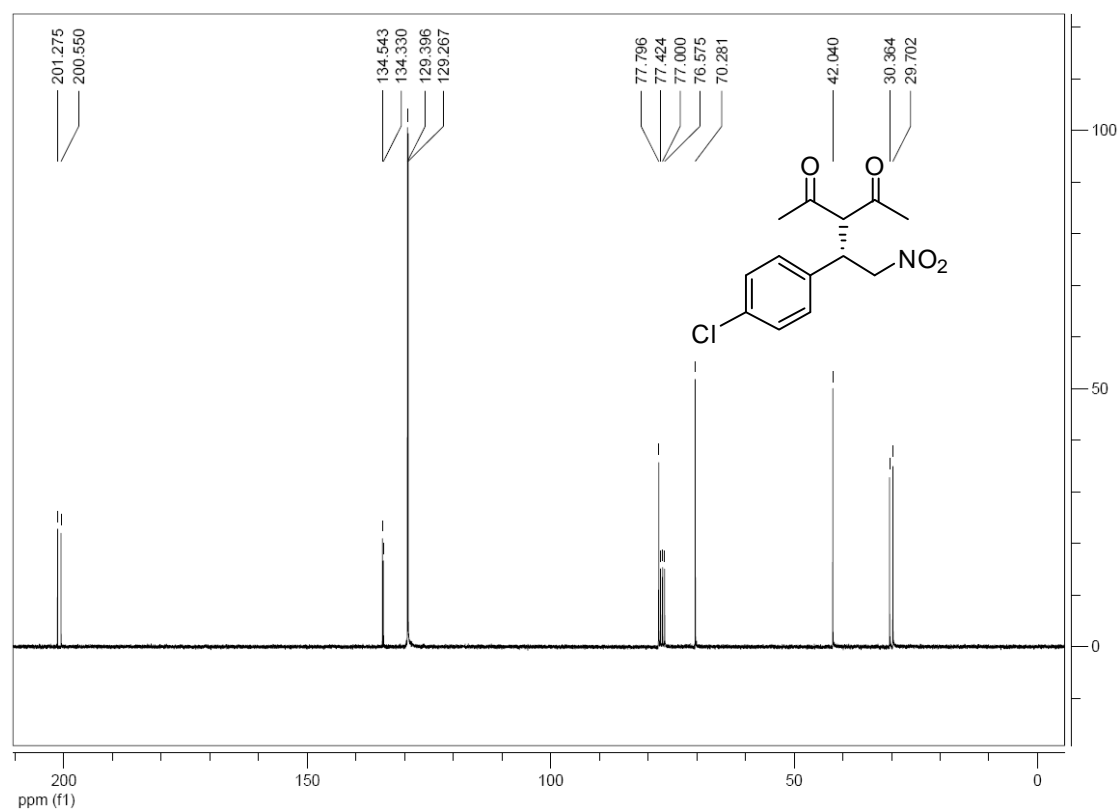

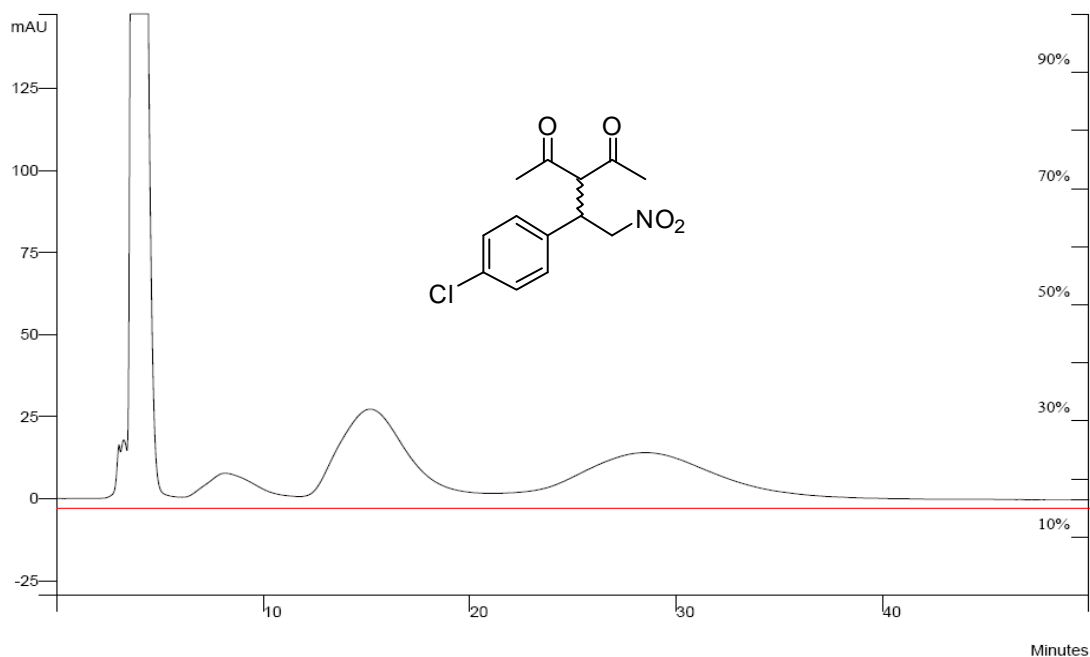

| Peak No       | Peak Name | Result ()       | Ret. Time (min) | Time Offset (min) | Area (counts)    | Rel Ret Time | Sep. Code | Width 1/2 (sec) | Status Codes | Group |
|---------------|-----------|-----------------|-----------------|-------------------|------------------|--------------|-----------|-----------------|--------------|-------|
| 1             |           | 50.6397         | 15.171          | 0.000             | 56614508         | 0.00         | BB        | 210.5           |              | 0     |
| 2             |           | 49.3603         | 28.500          | 0.000             | 55184232         | 0.00         | BB        | 383.0           |              | 0     |
| <b>Totals</b> |           | <b>100.0000</b> |                 | <b>0.000</b>      | <b>111798736</b> |              |           |                 |              |       |

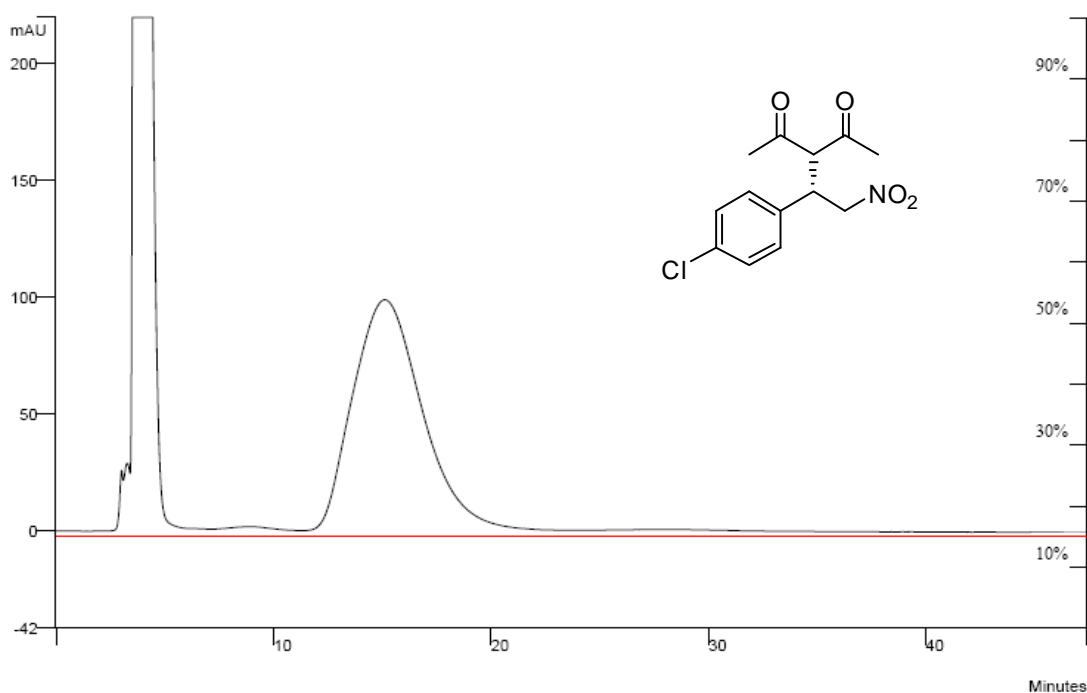

| Peak No       | Peak Name | Result ()       | Ret. Time (min) | Time Offset (min) | Area (counts)    | Rel Ret Time | Sep. Code | Width 1/2 (sec) | Status Codes | Group |
|---------------|-----------|-----------------|-----------------|-------------------|------------------|--------------|-----------|-----------------|--------------|-------|
| 1             |           | 99.5330         | 15.125          | 0.000             | 217833344        | 0.00         | BB        | 208.1           |              | 0     |
| 2             |           | 0.4670          | 28.021          | 0.000             | 1022017          | 0.00         | BB        | 207.9           |              | 0     |
| <b>Totals</b> |           | <b>100.0000</b> |                 | <b>0.000</b>      | <b>218855360</b> |              |           |                 |              |       |

### 3f (Entry 12, Table 2)

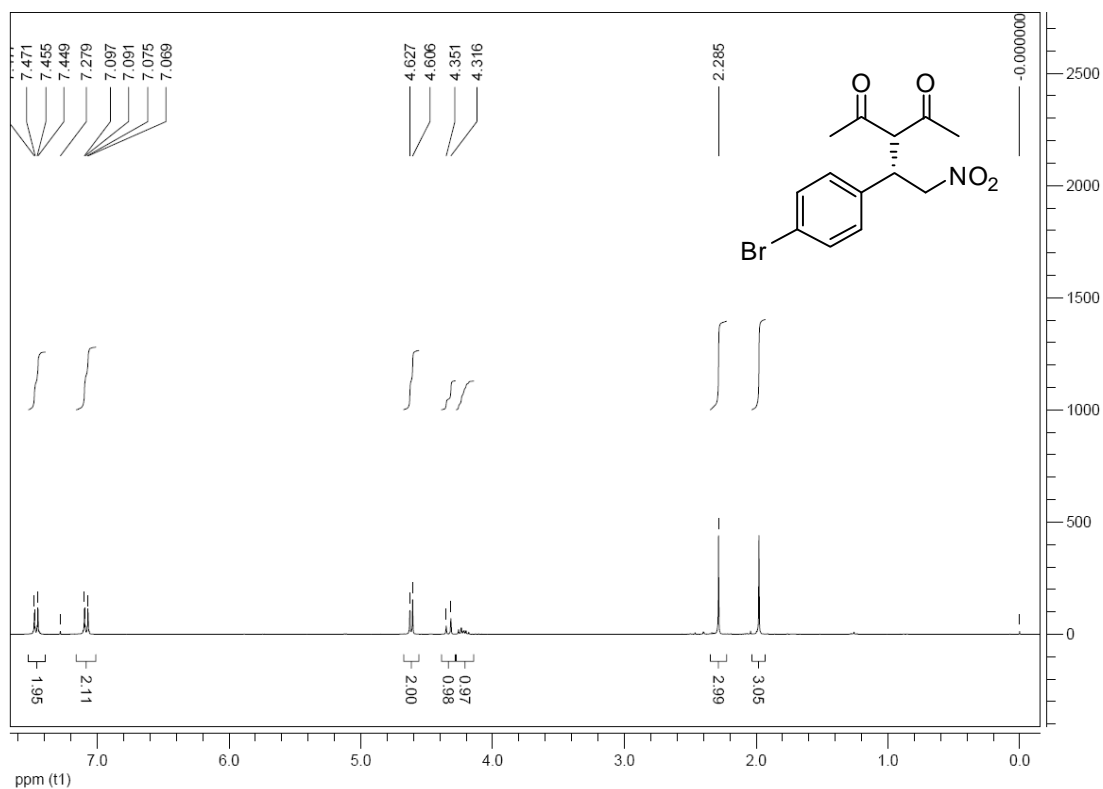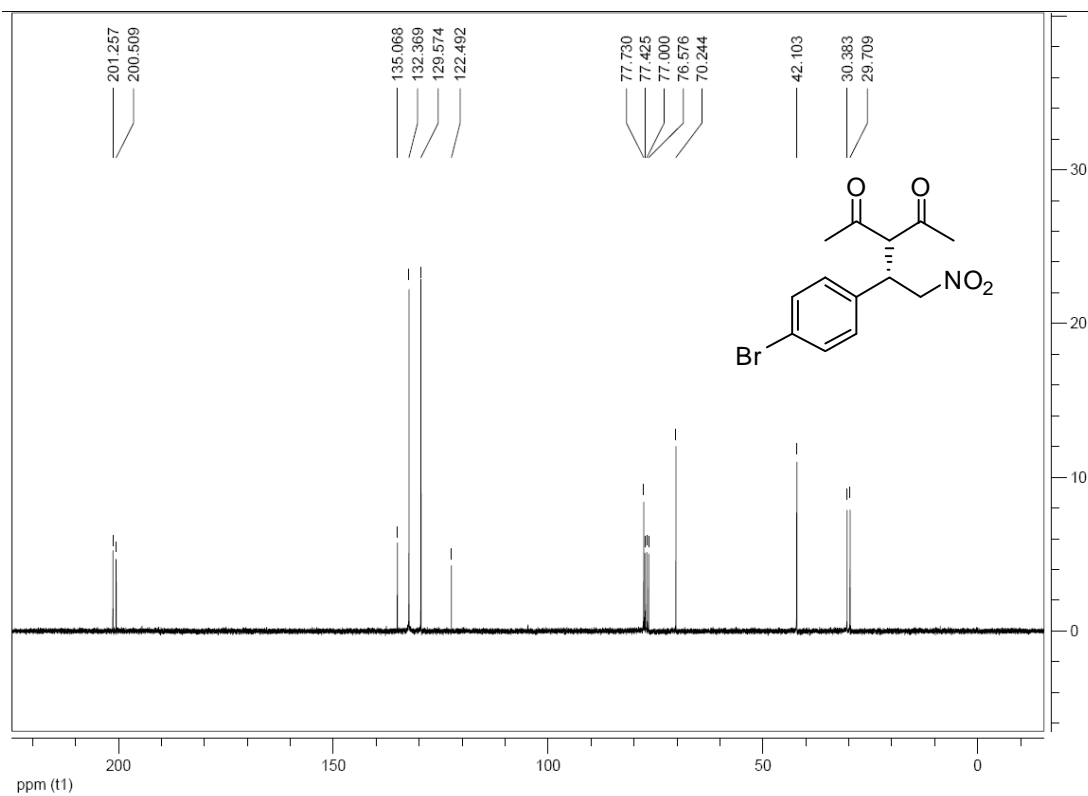

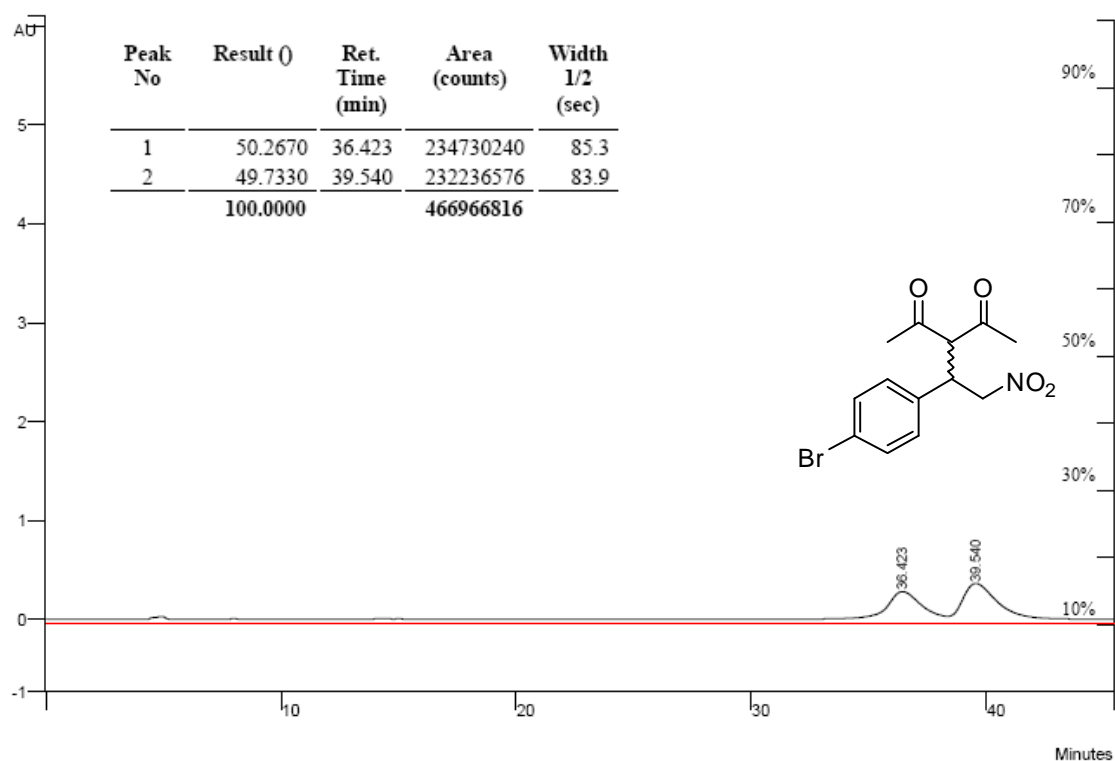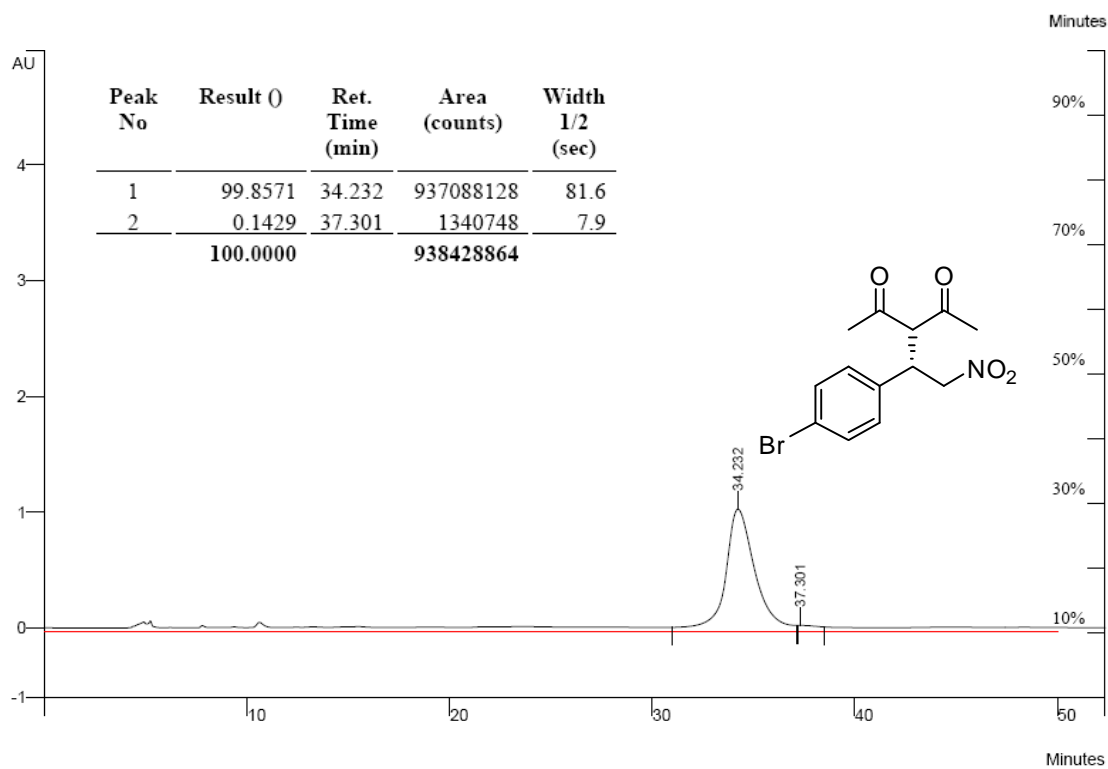

### 3g (Entry 14, Table 2)

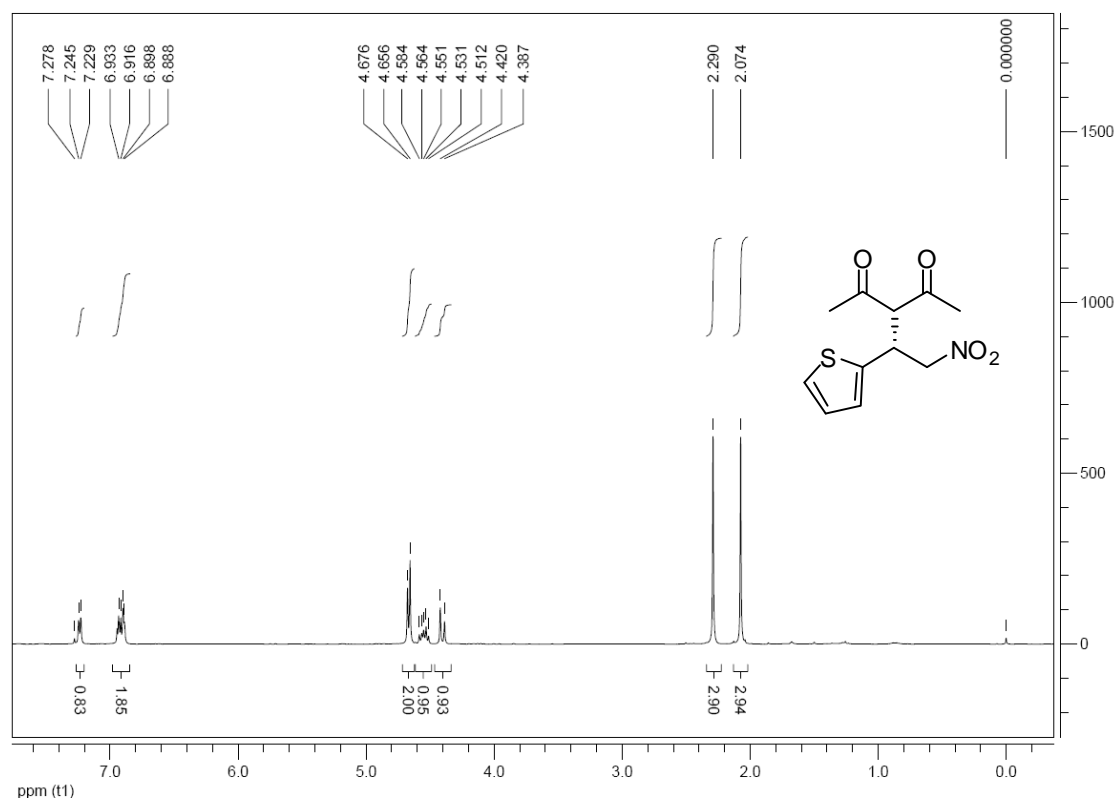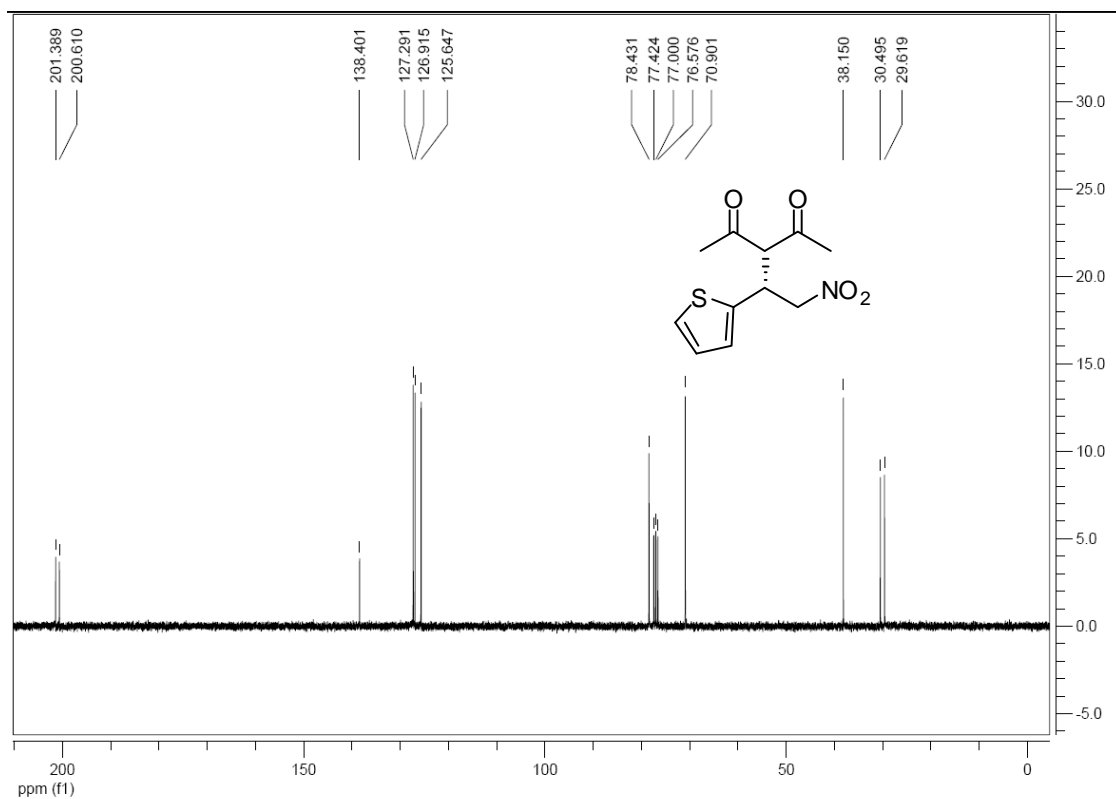

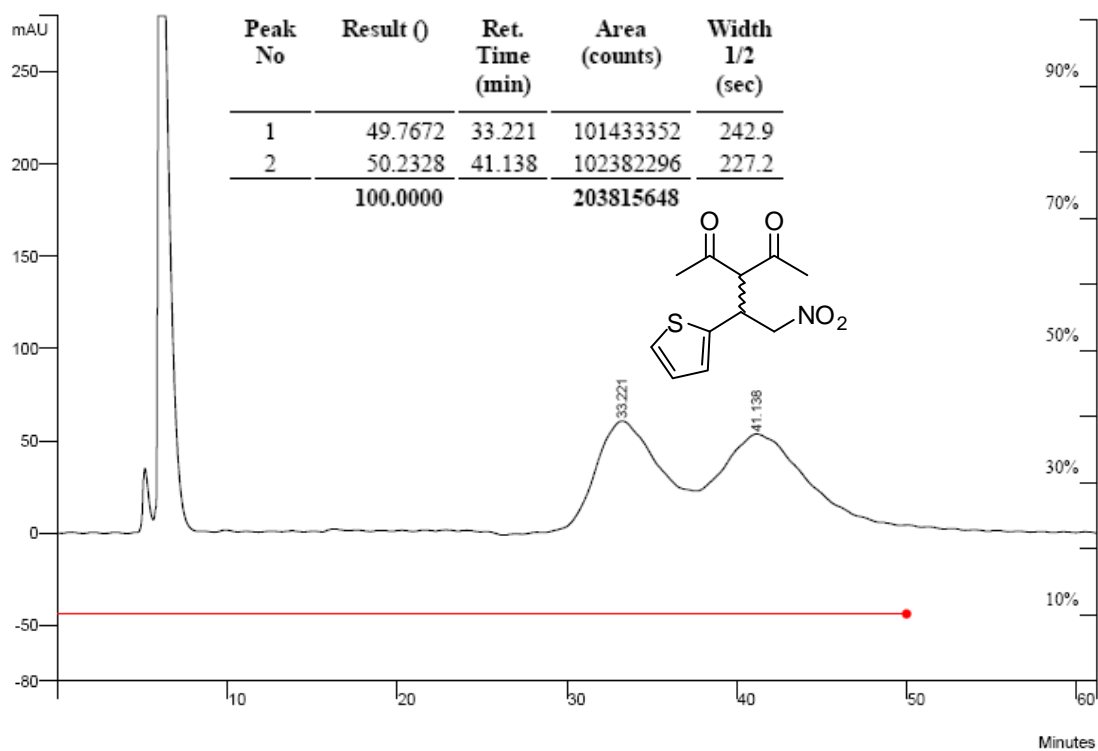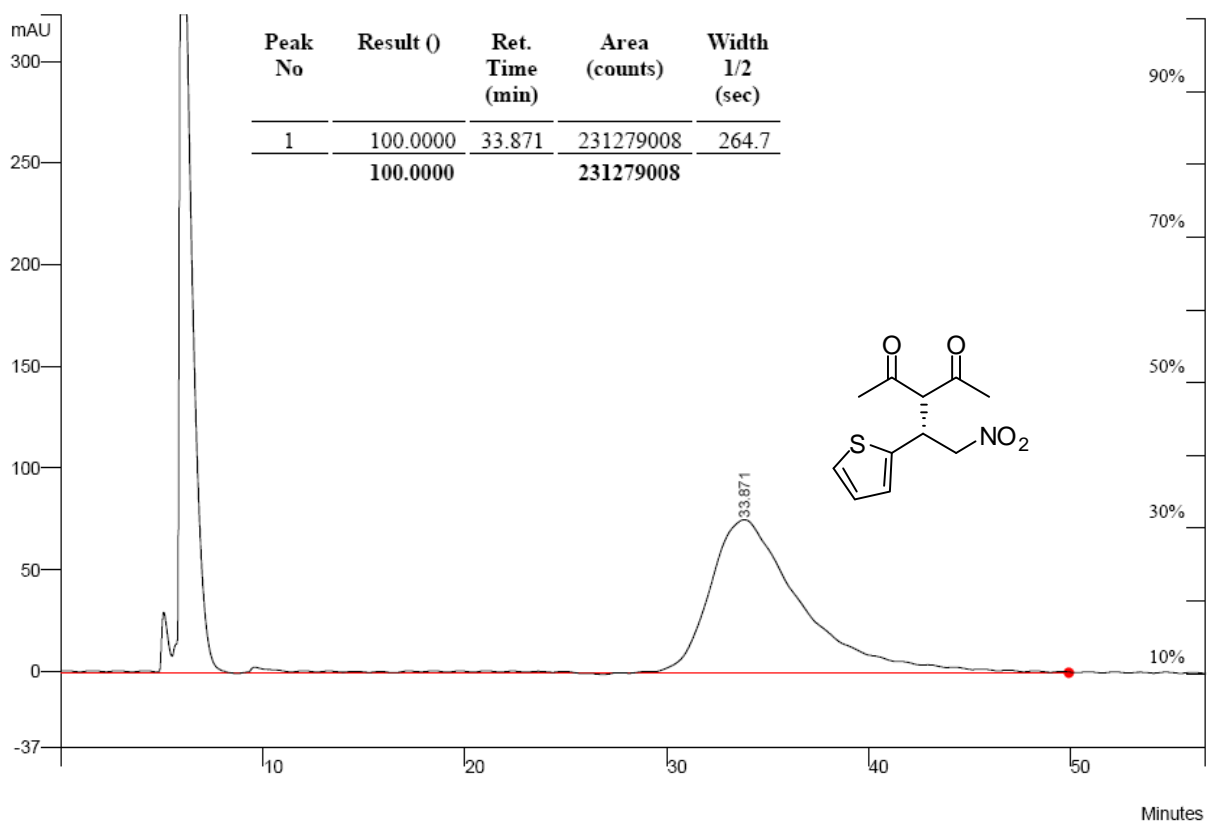

**3h (Entry 16, Table 2)**

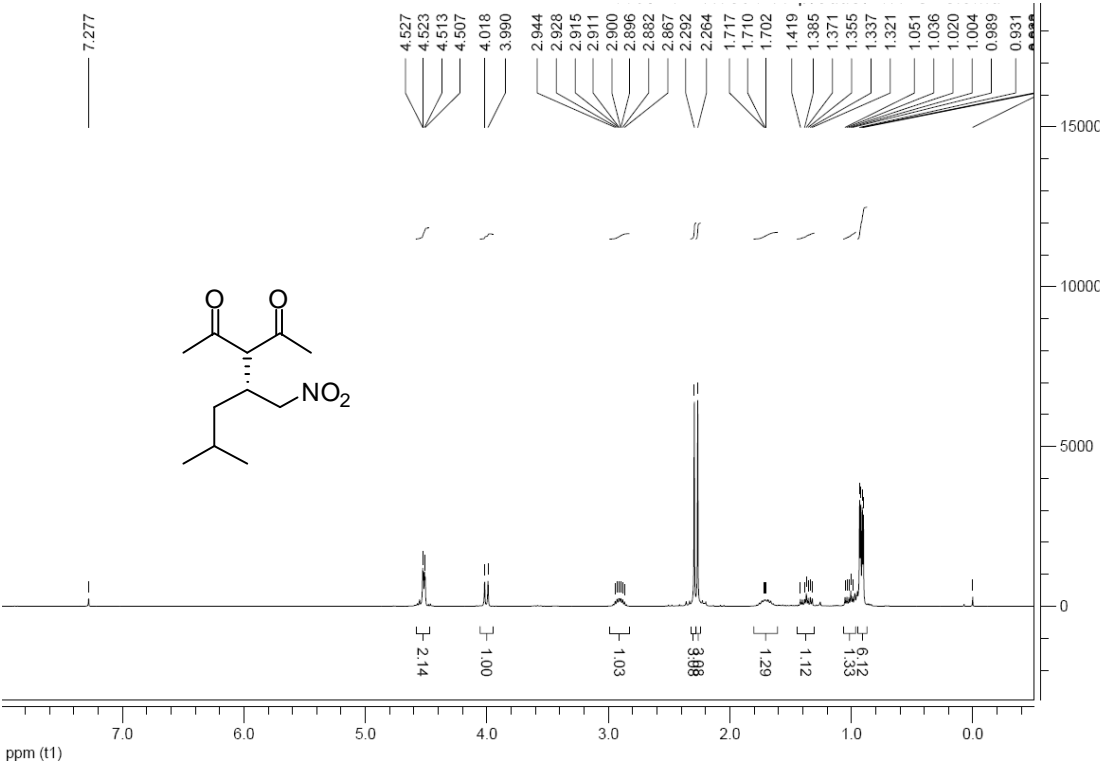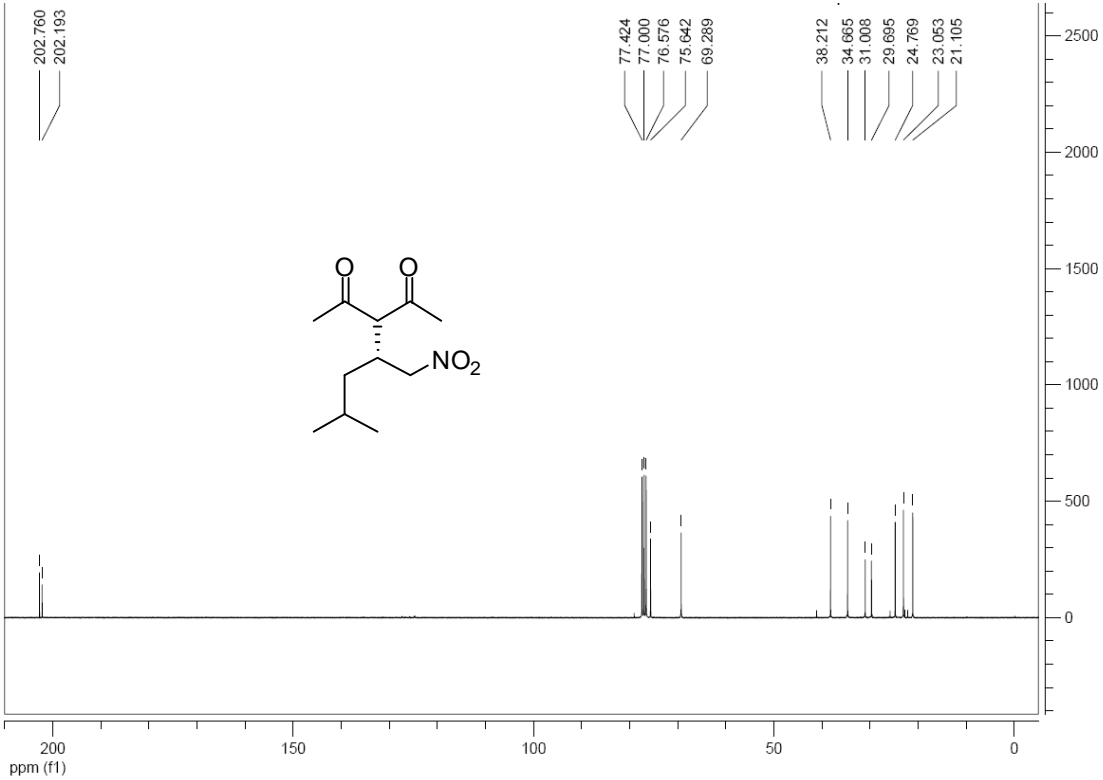

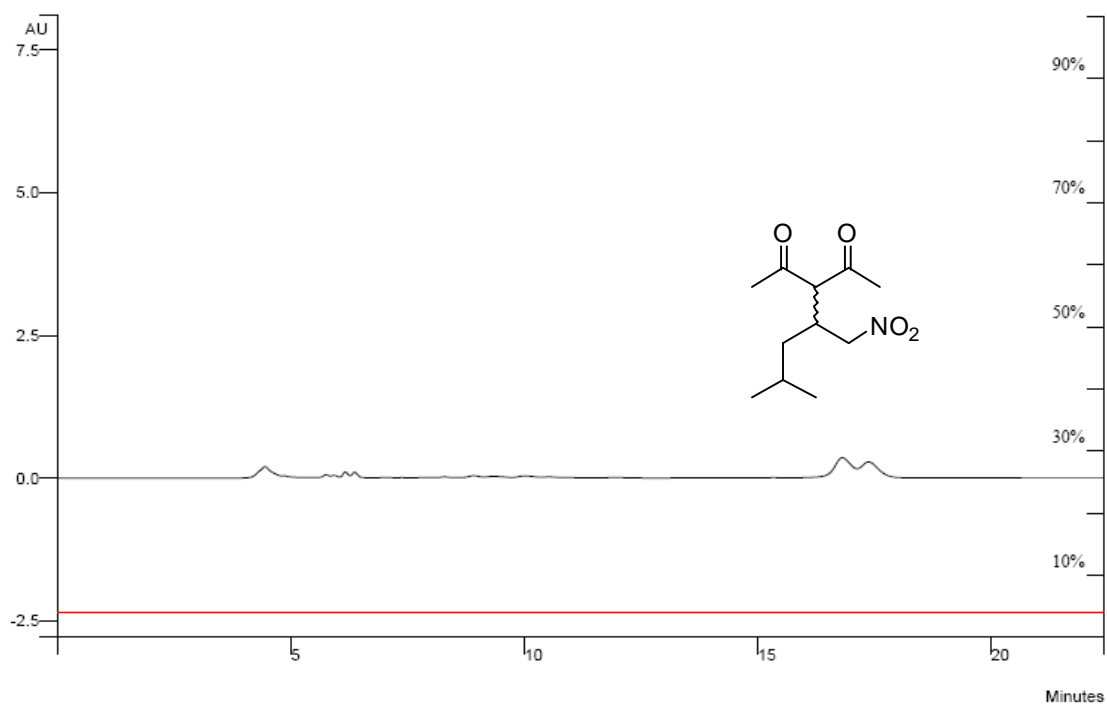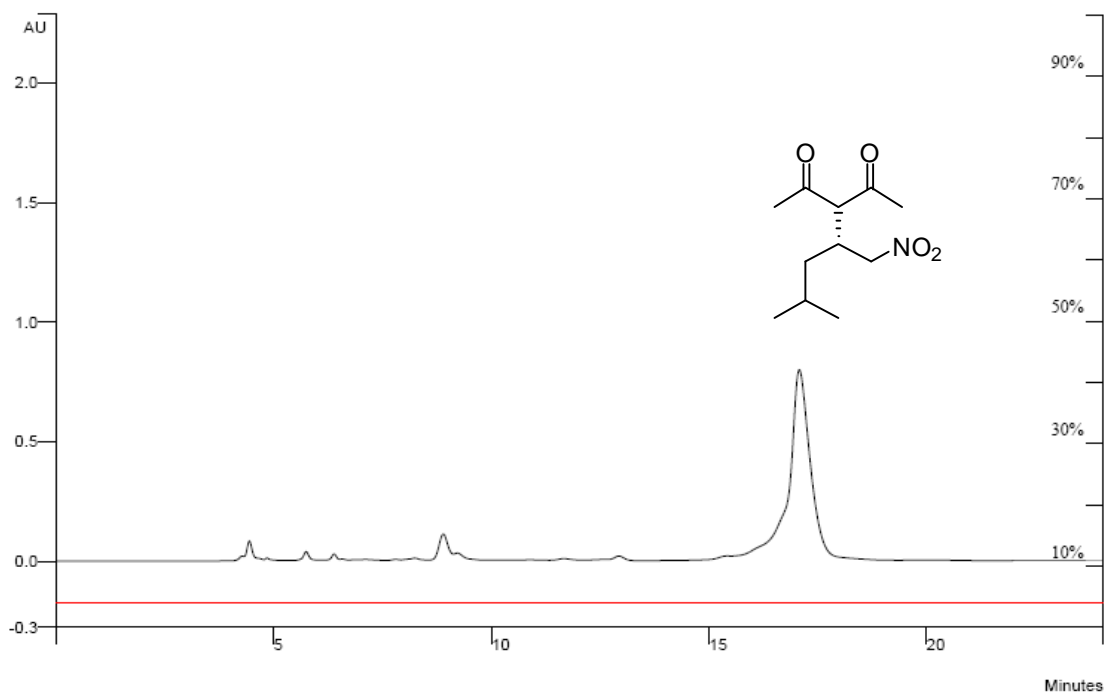

## 6. $^1\text{H}$ NMR, $^{13}\text{C}$ NMR and HPLC Spectra for Table 3

### 5a (Entry 2, Table 3)

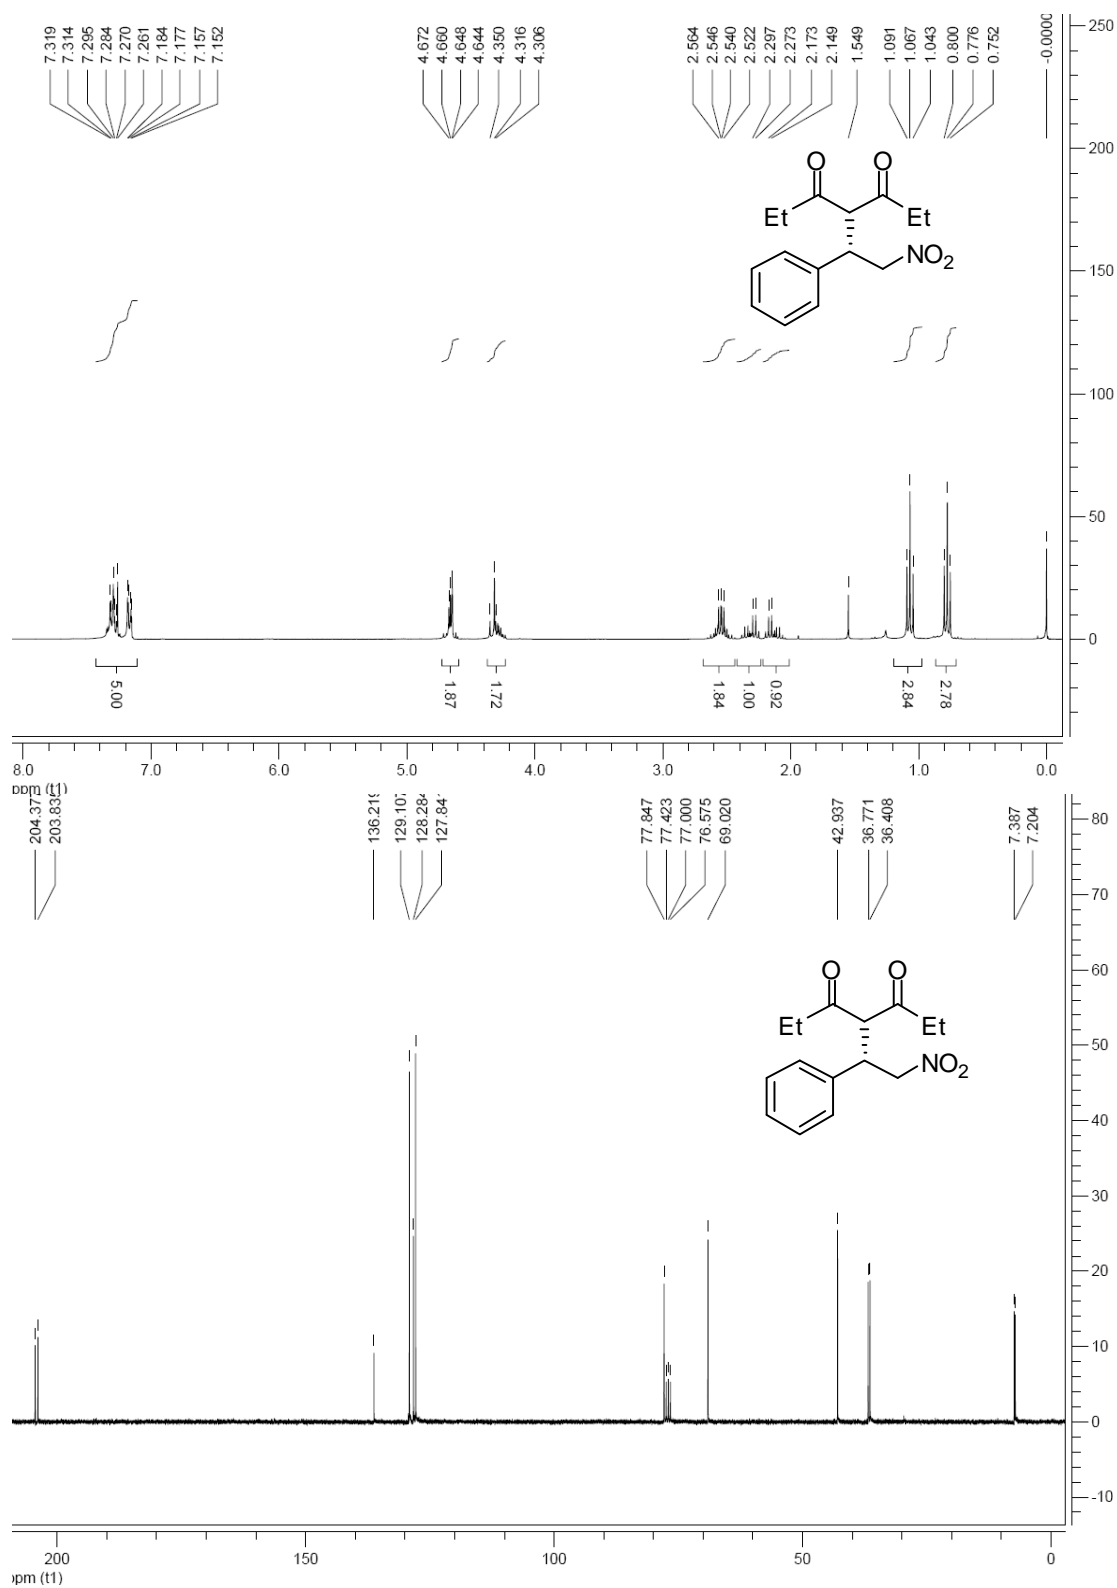

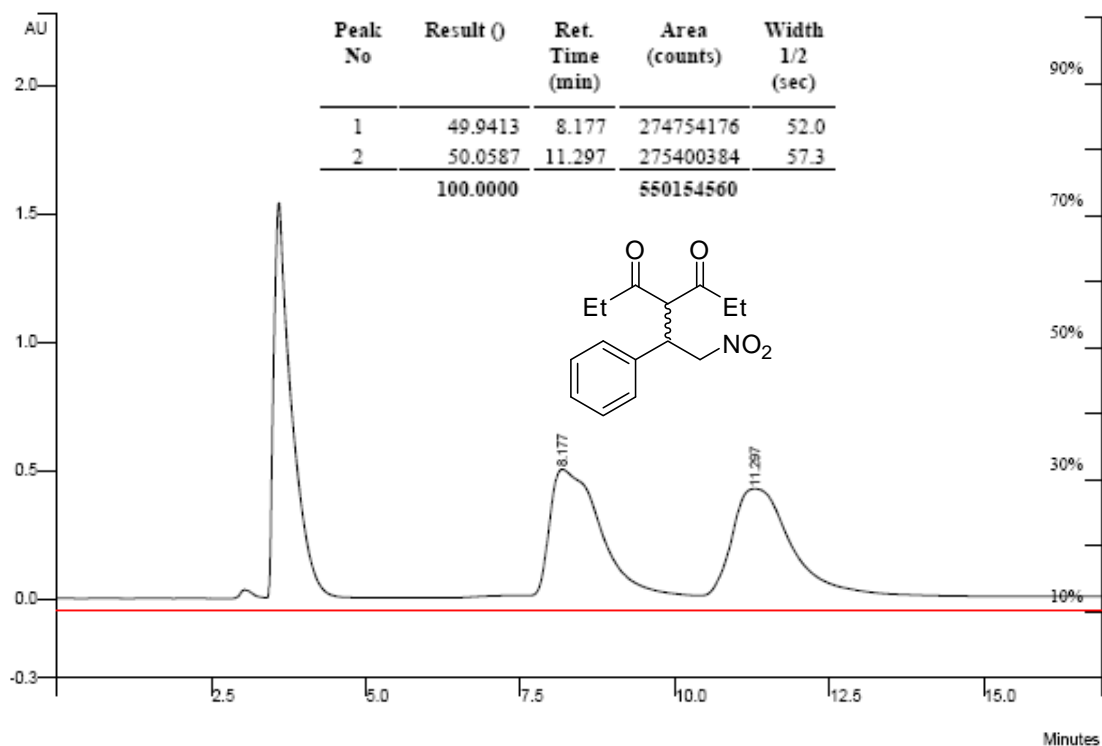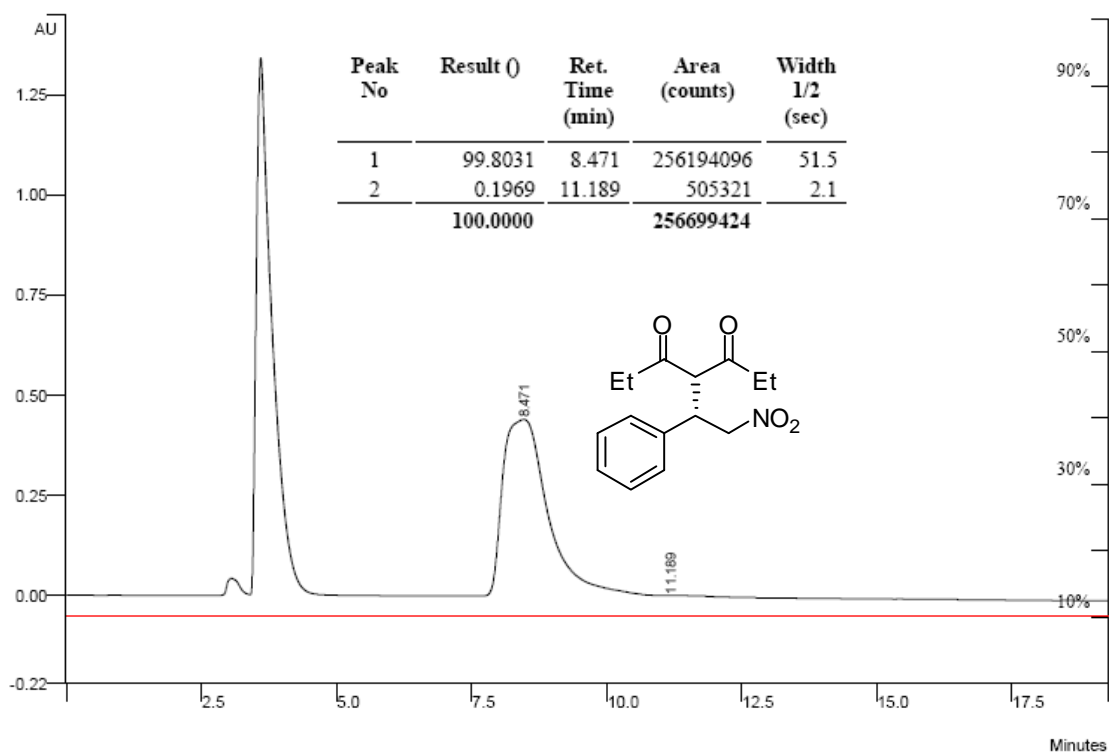

**5b (Entry 4, Table 3)**

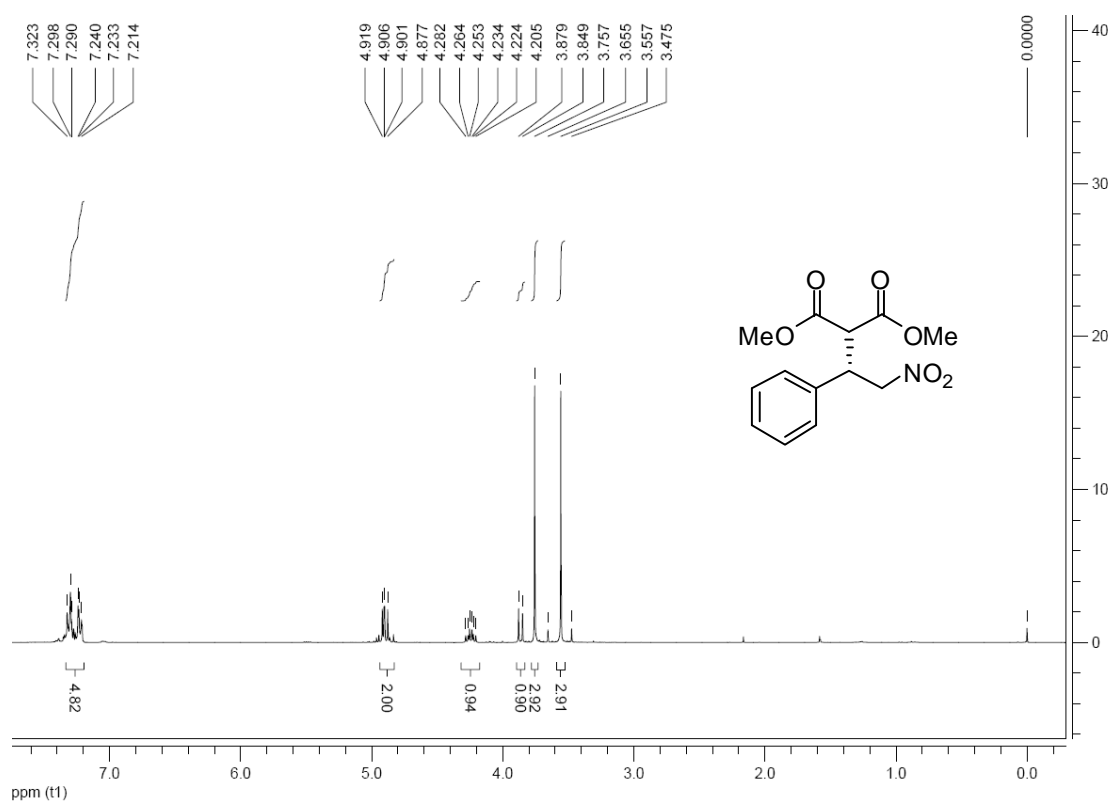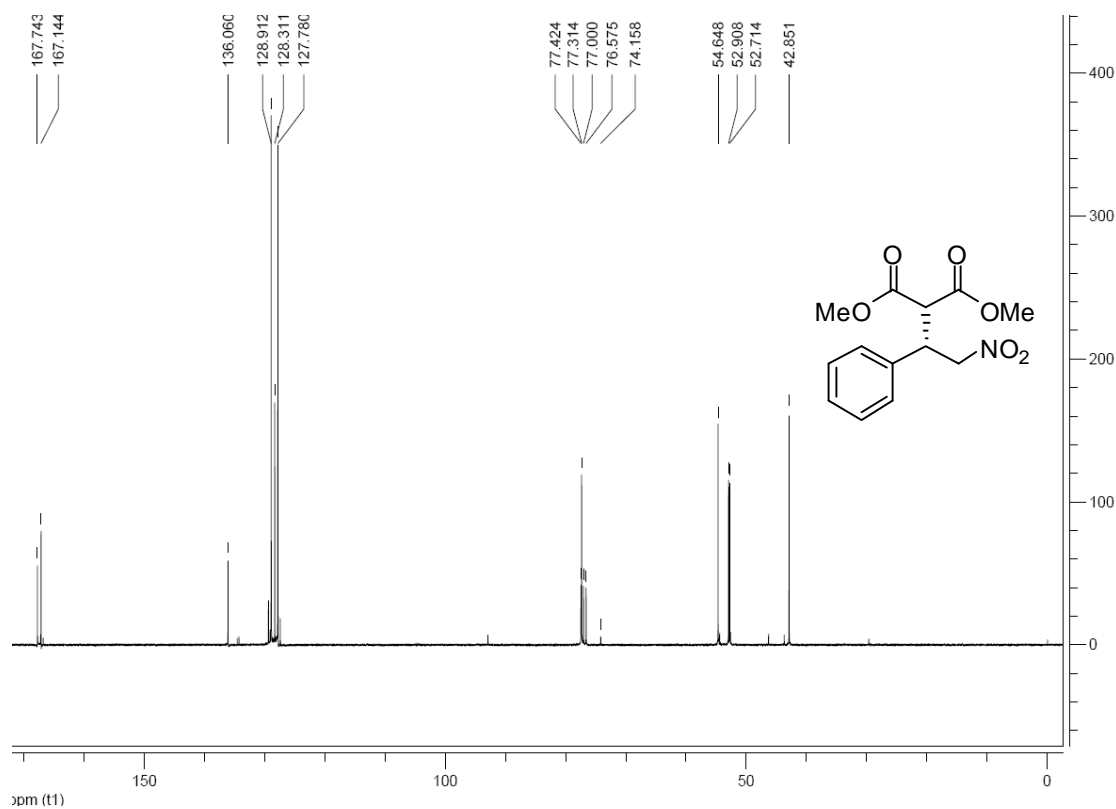

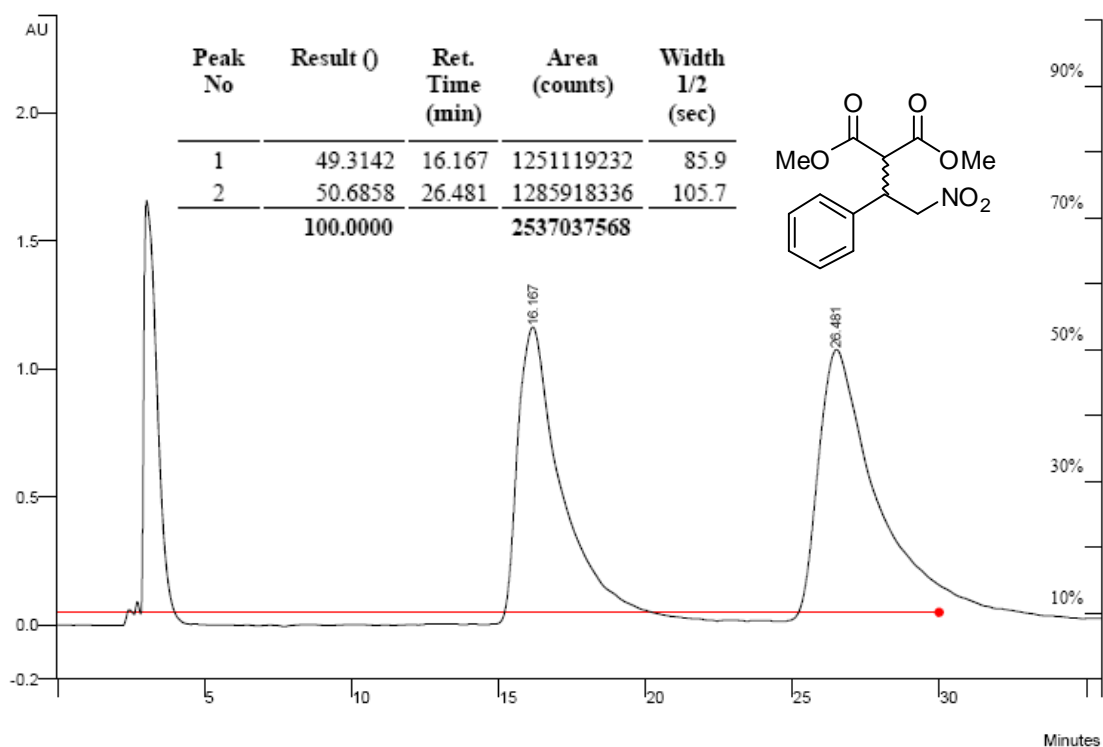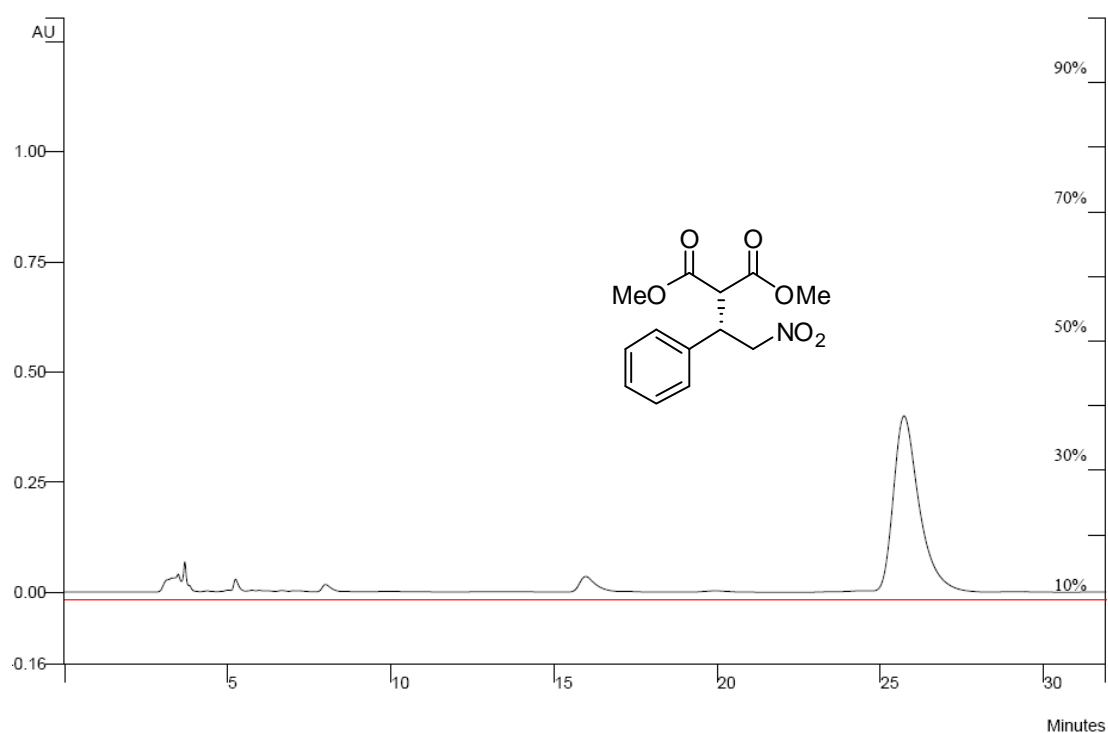

5c (Entry 6, Table 3)

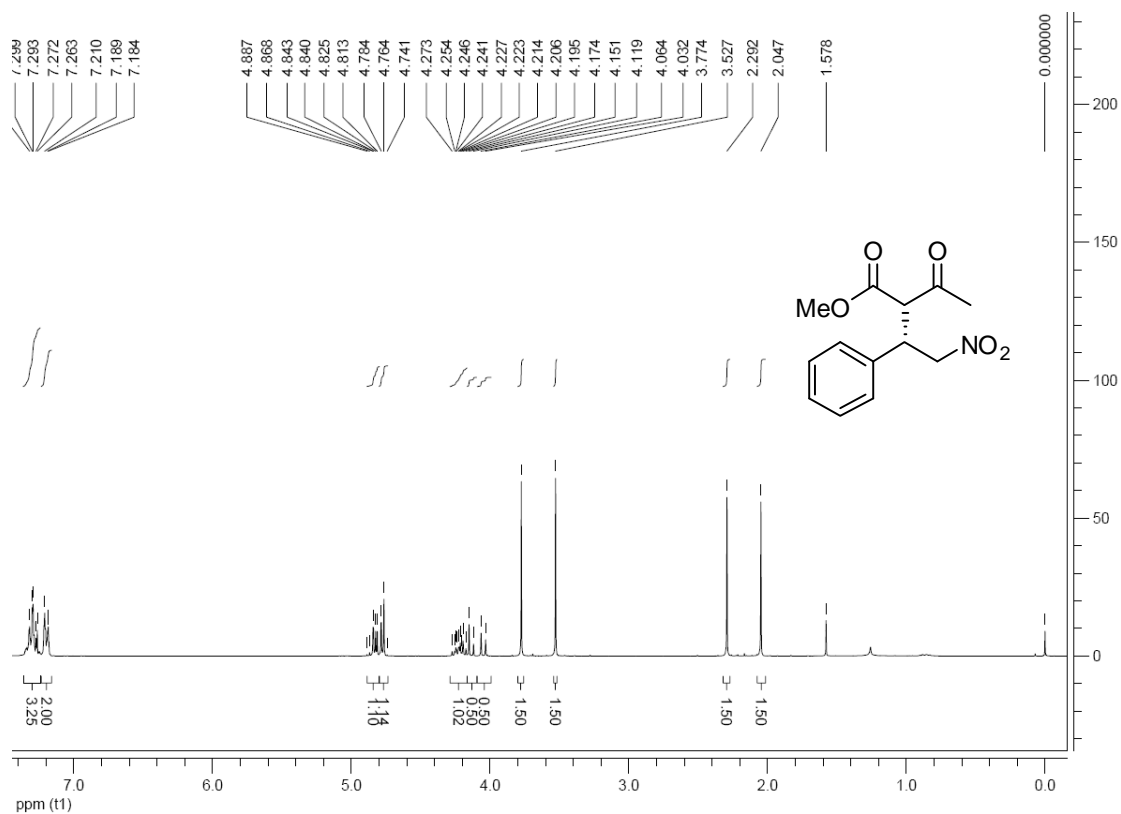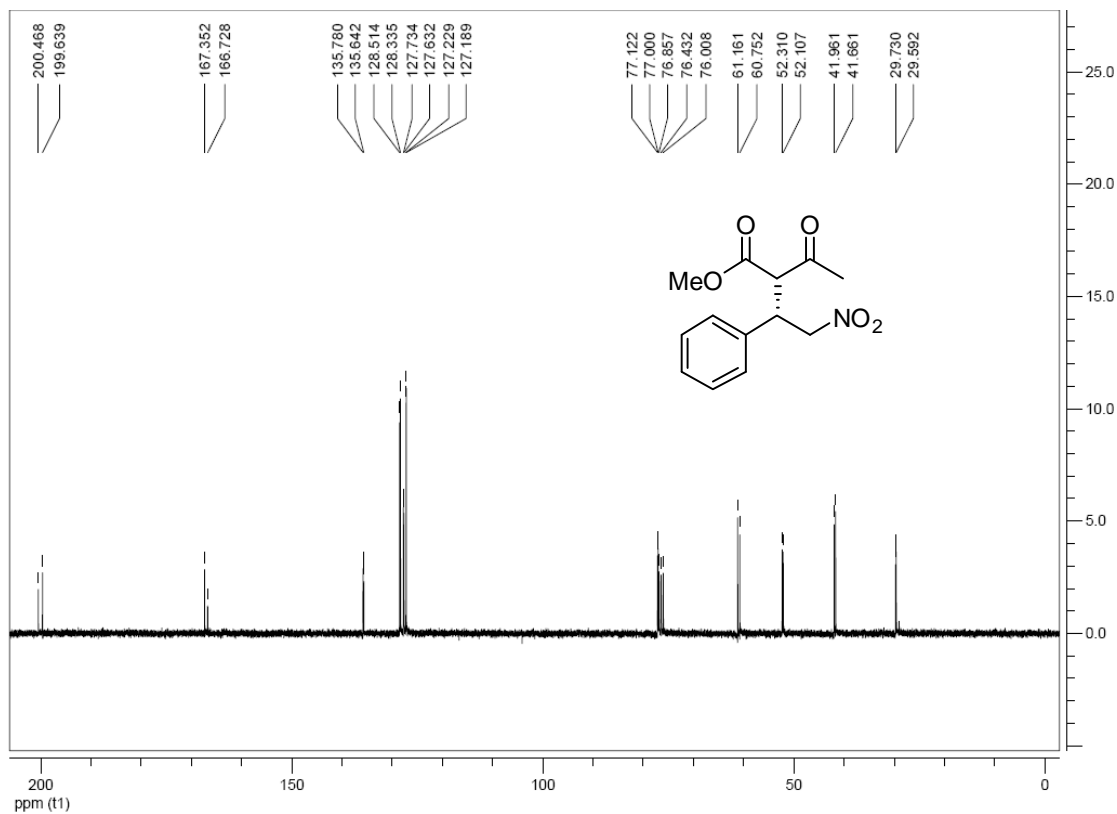

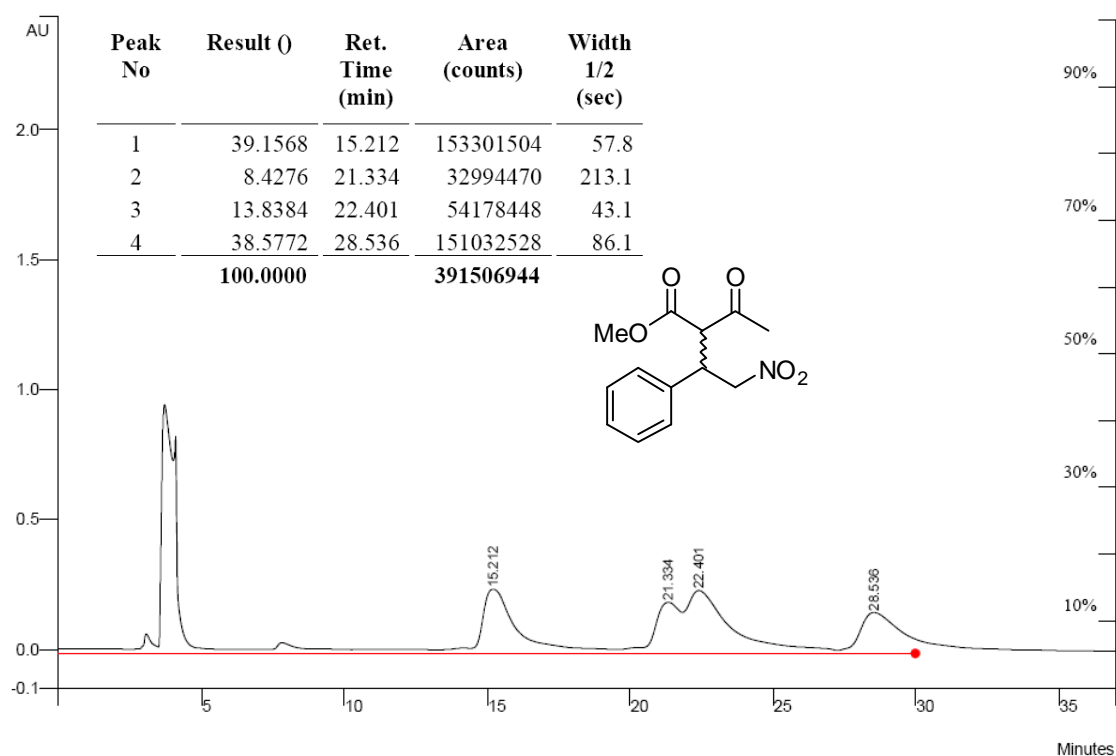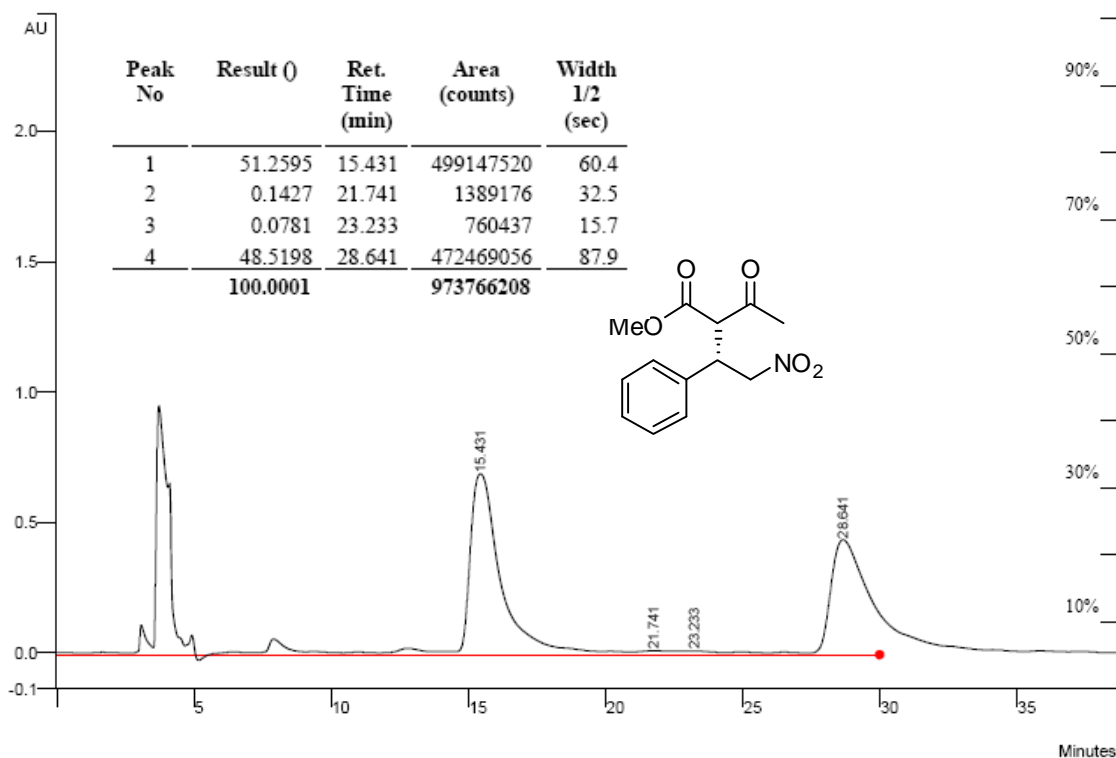

**5d (Entry 8, Table 3)**

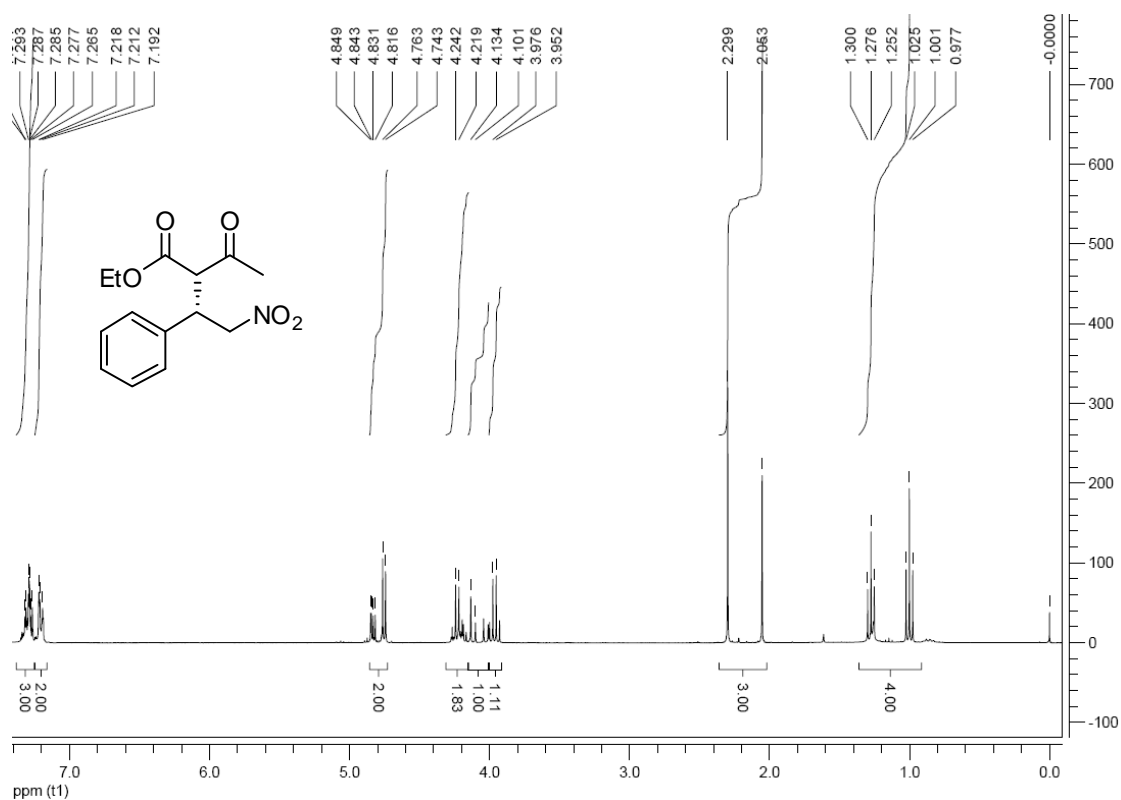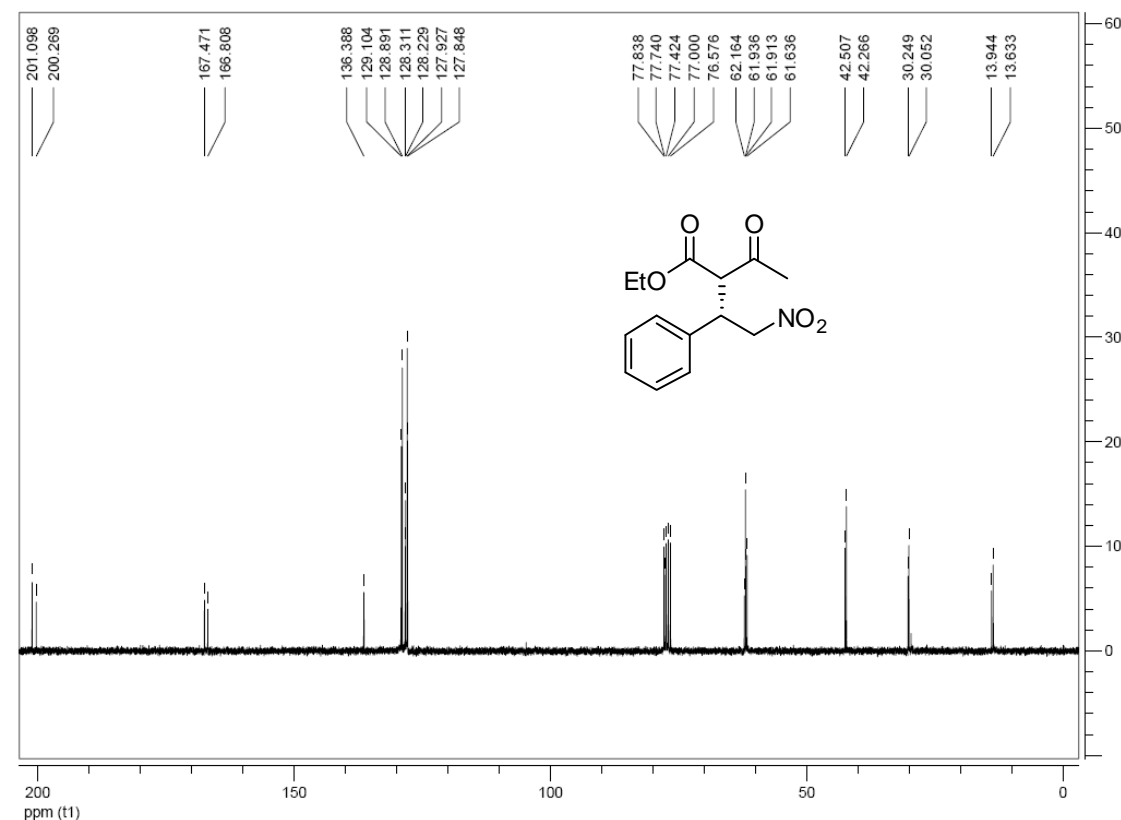

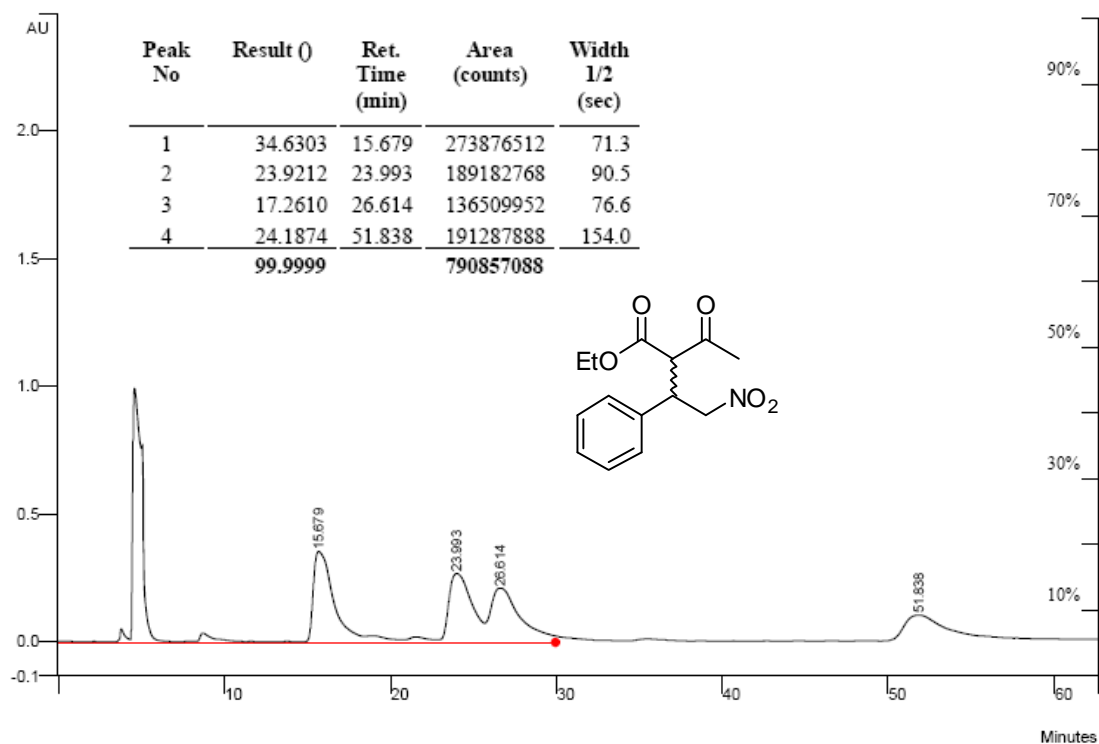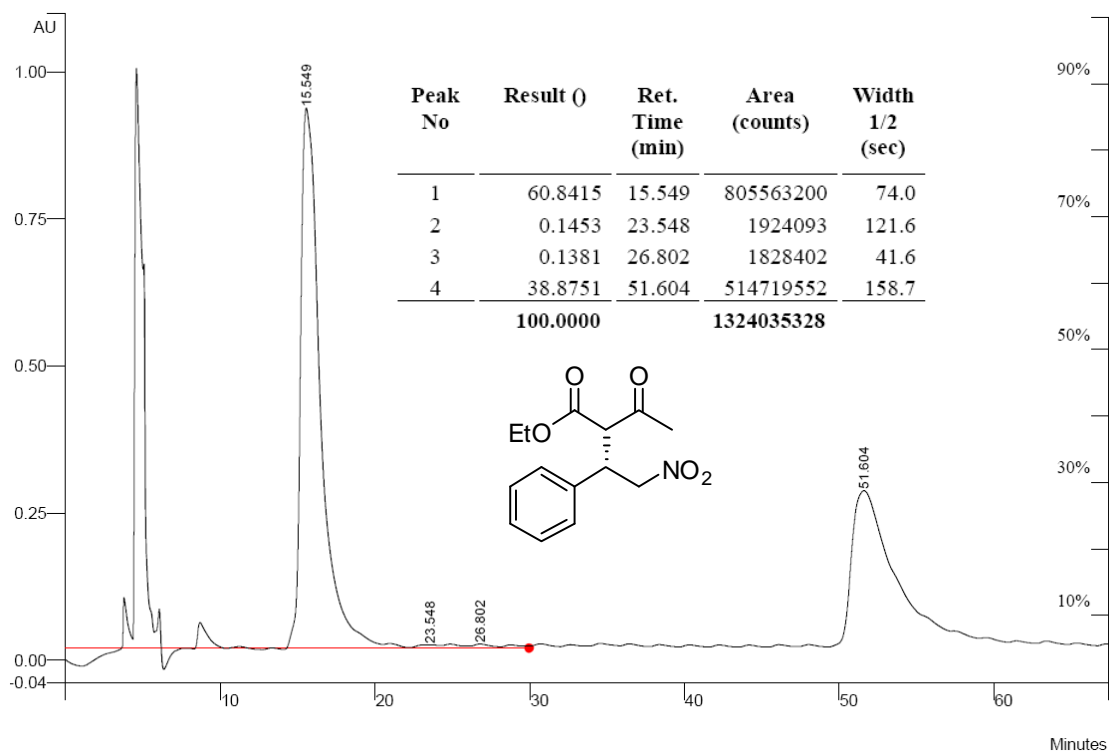

**5e (Entry 10, Table 3)**

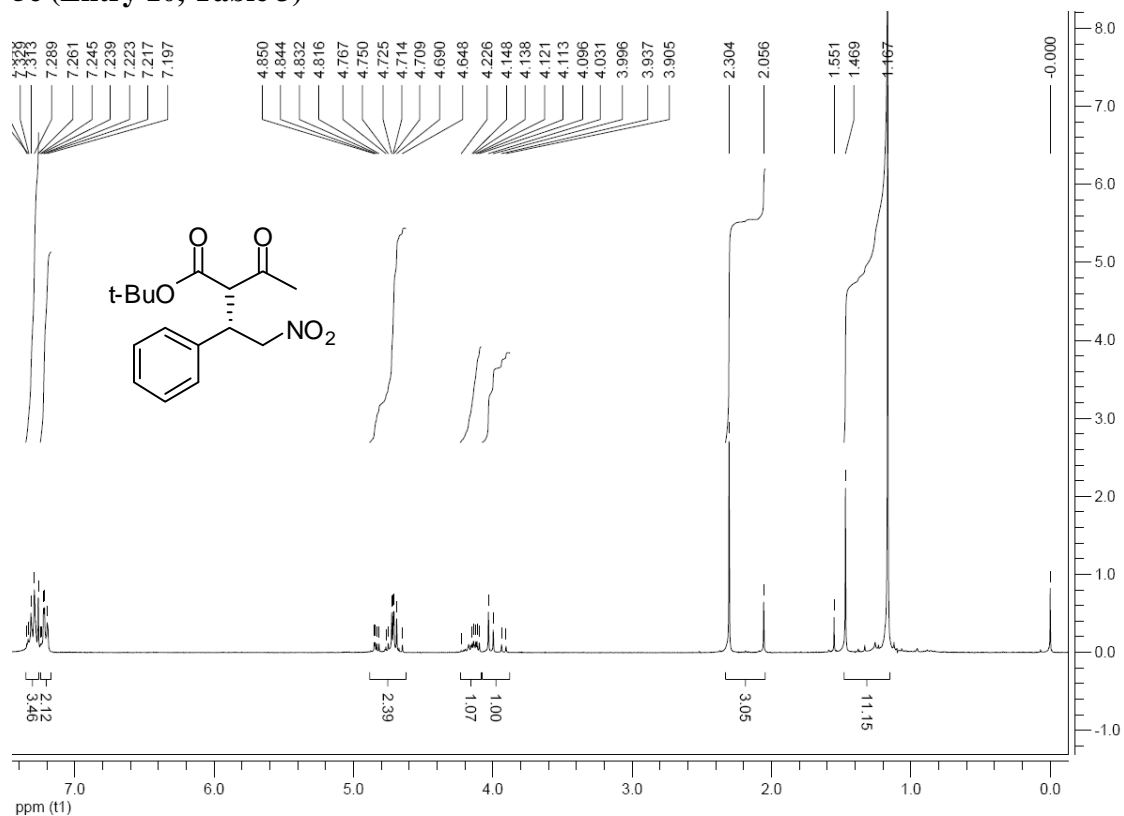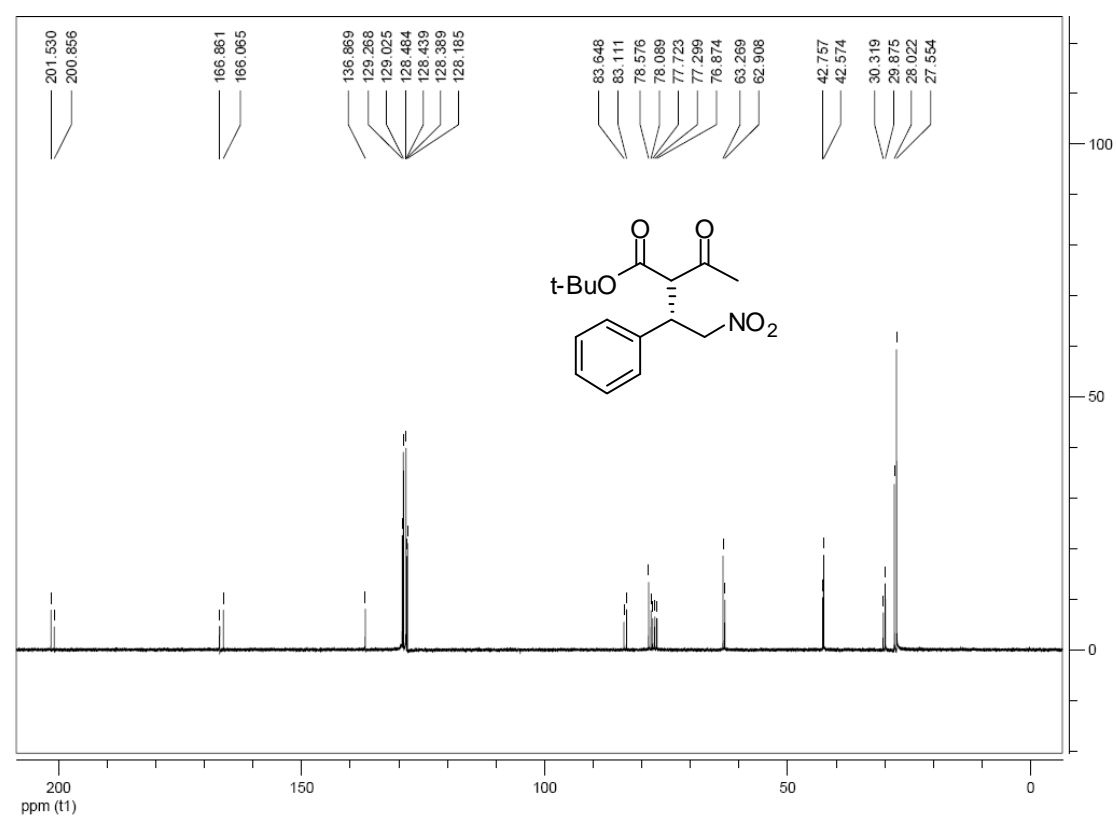

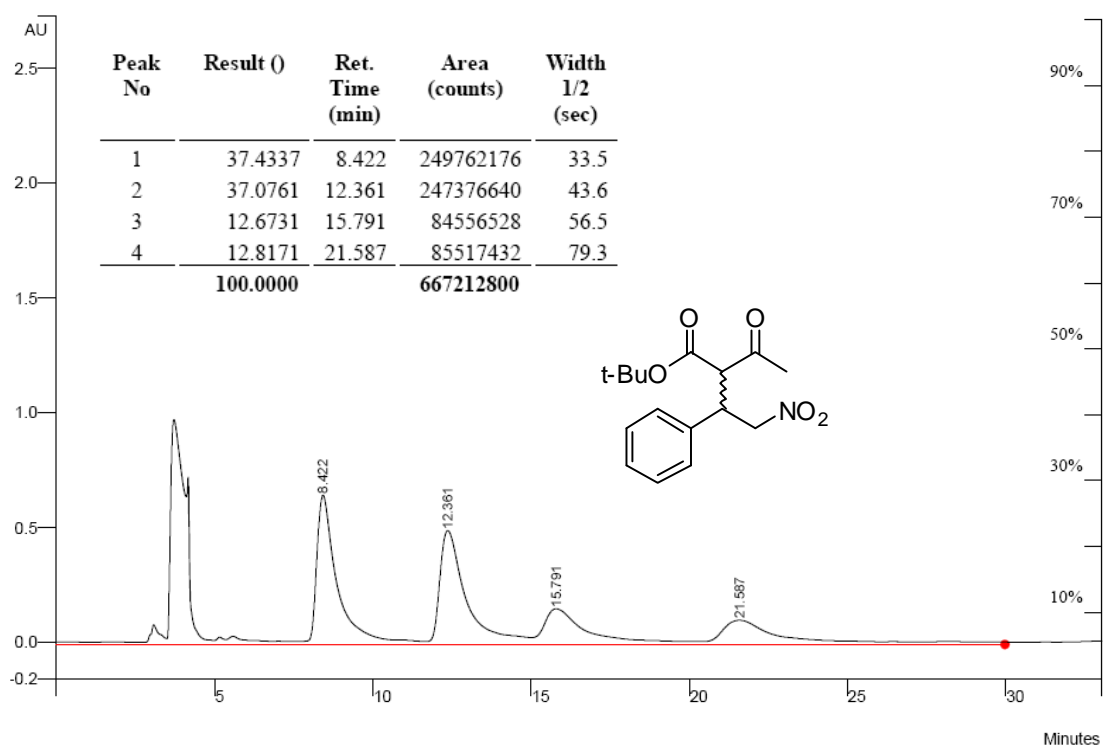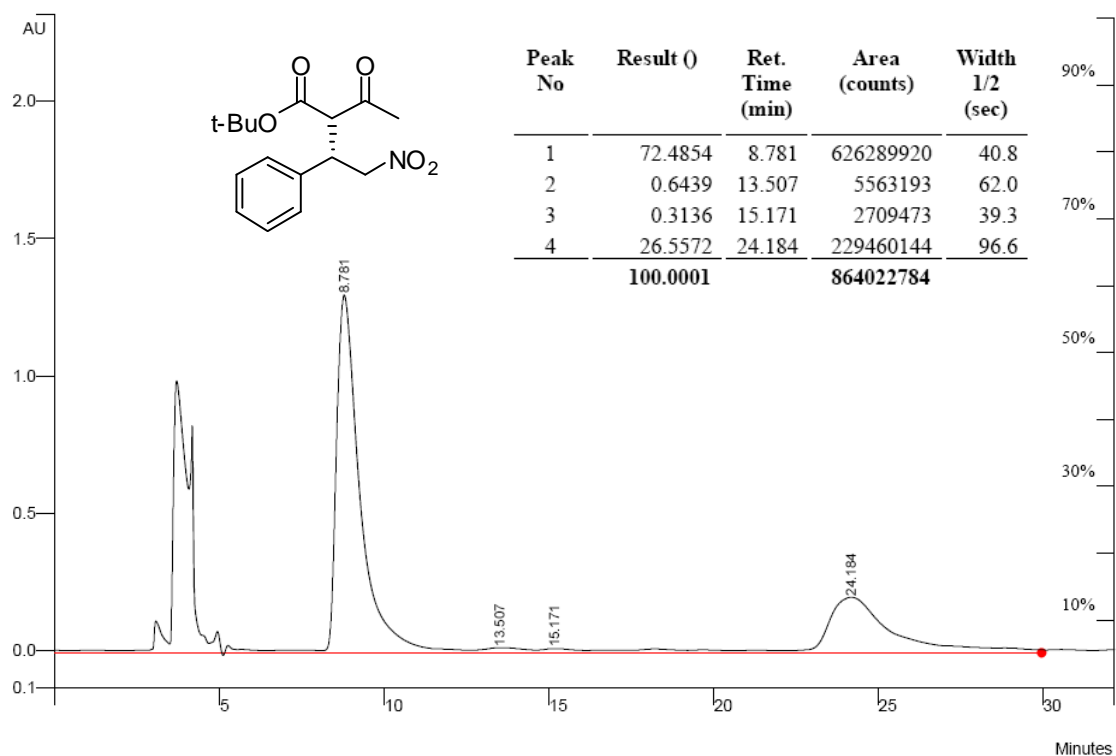

**5f (Entry 12, Table 3)**

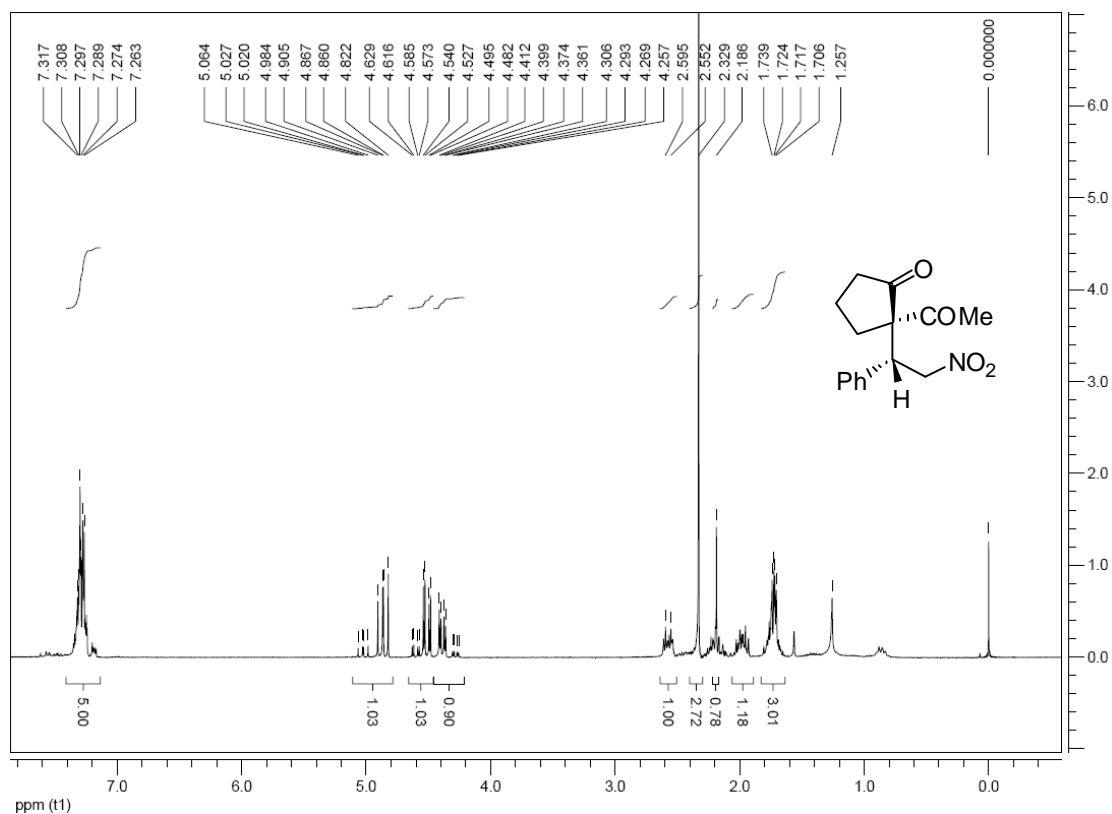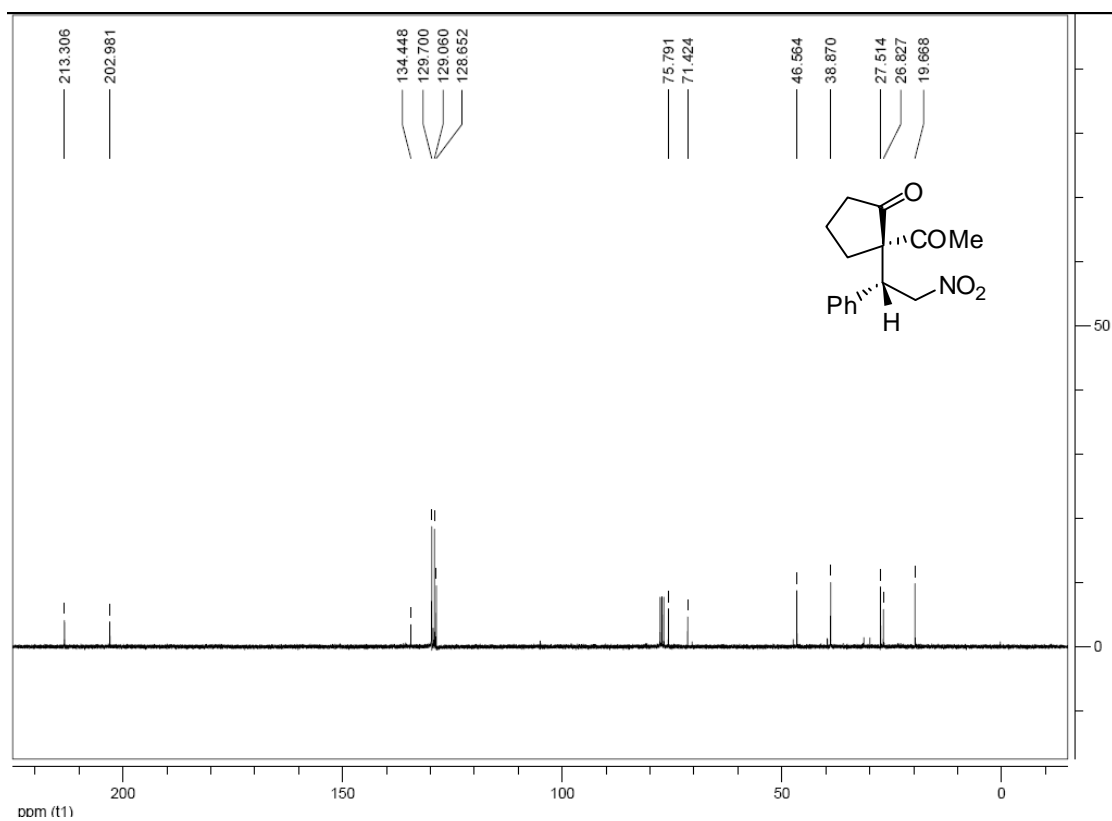

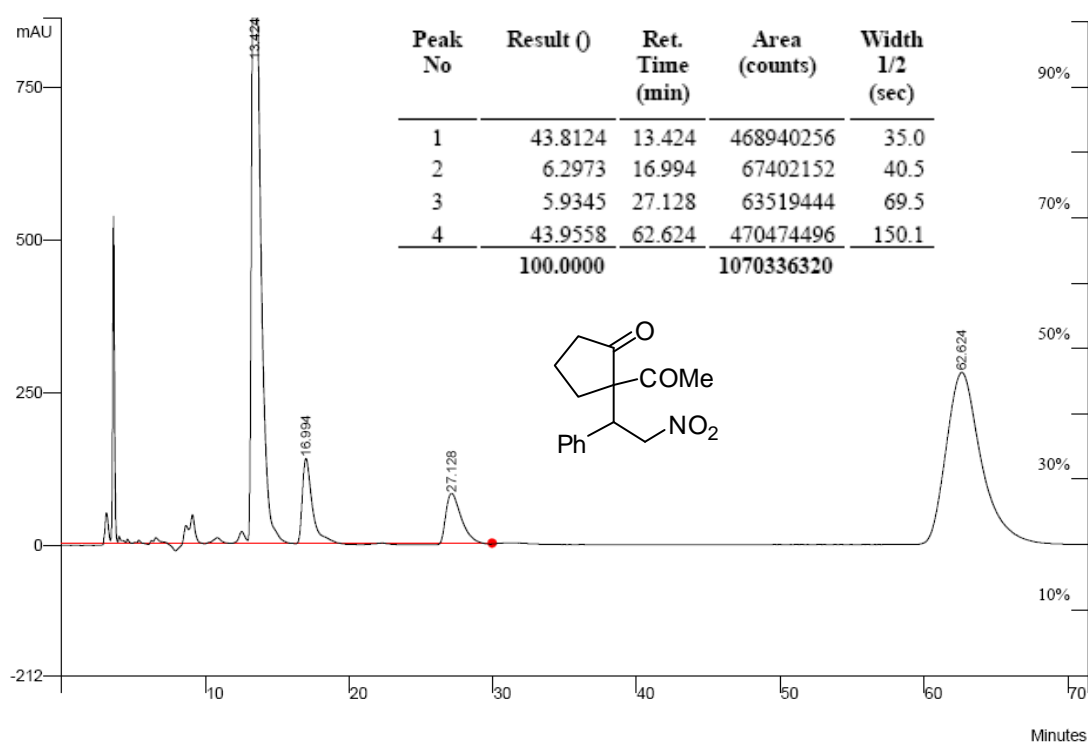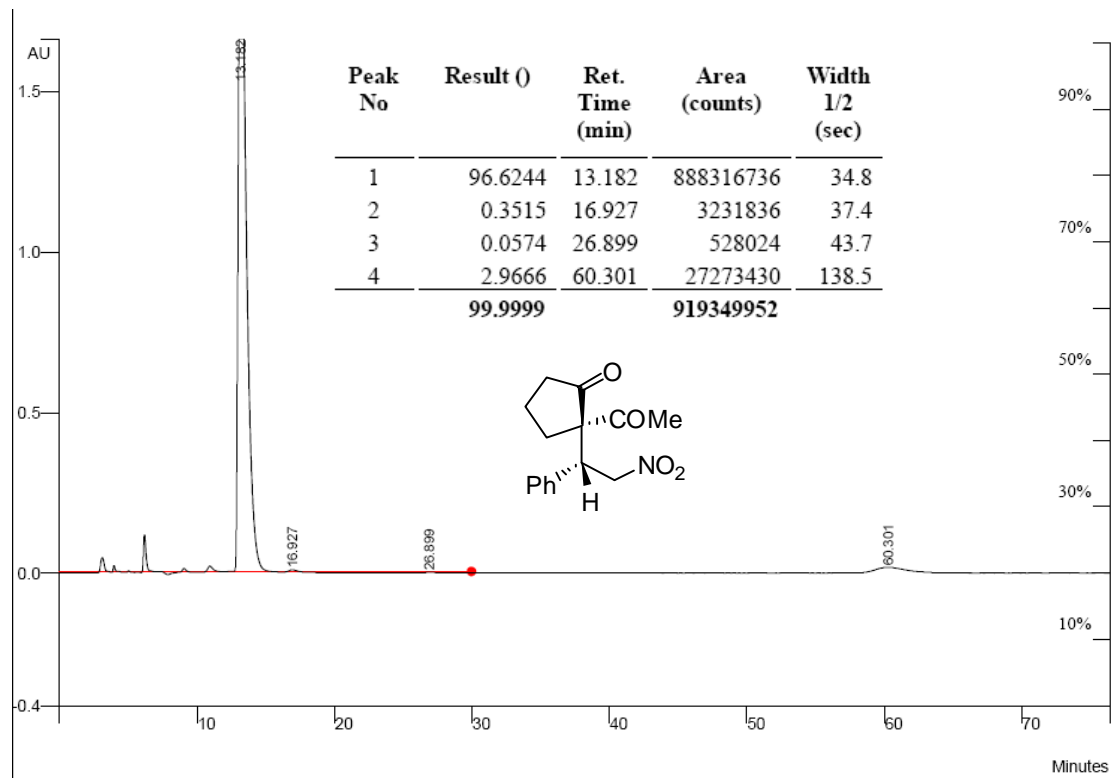

**5g (Entry 14, Table 3)**

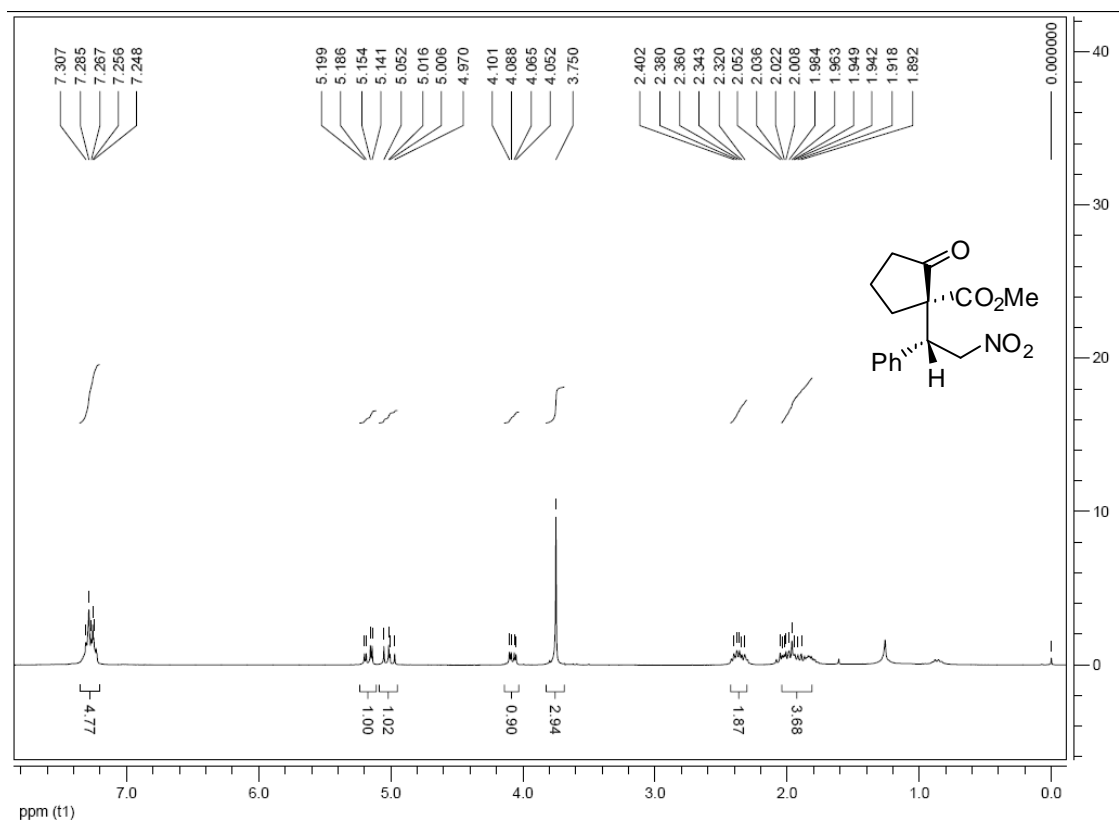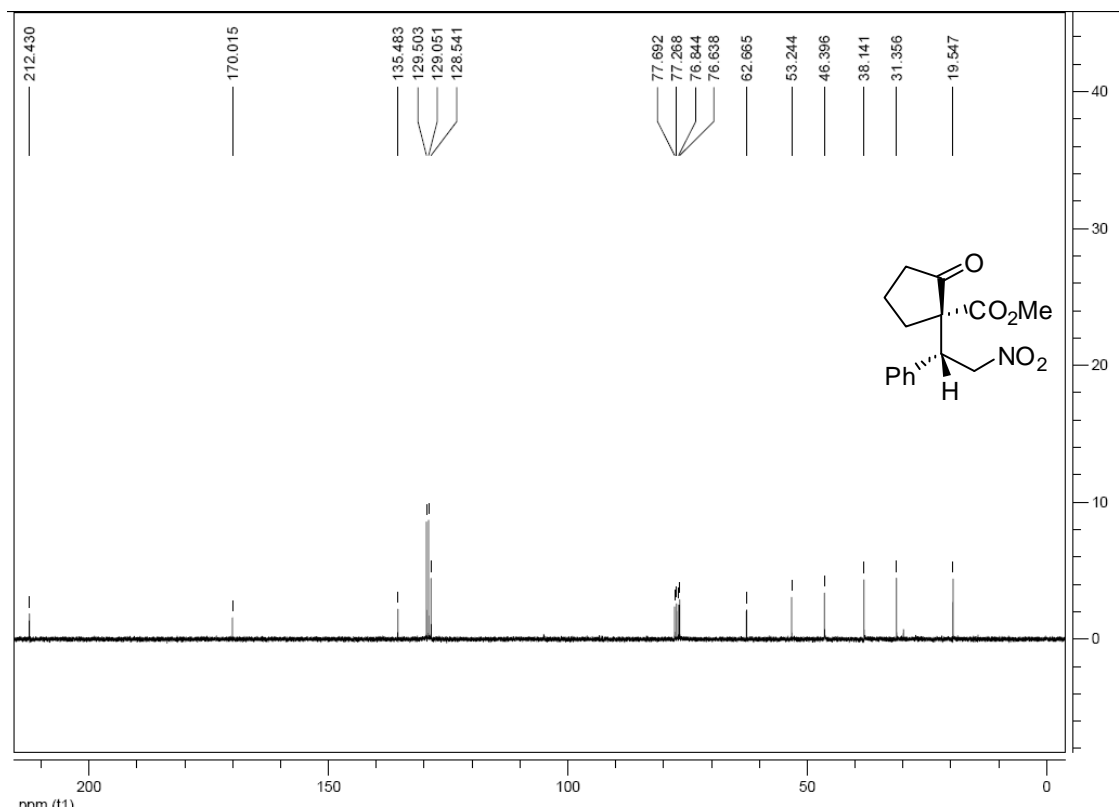

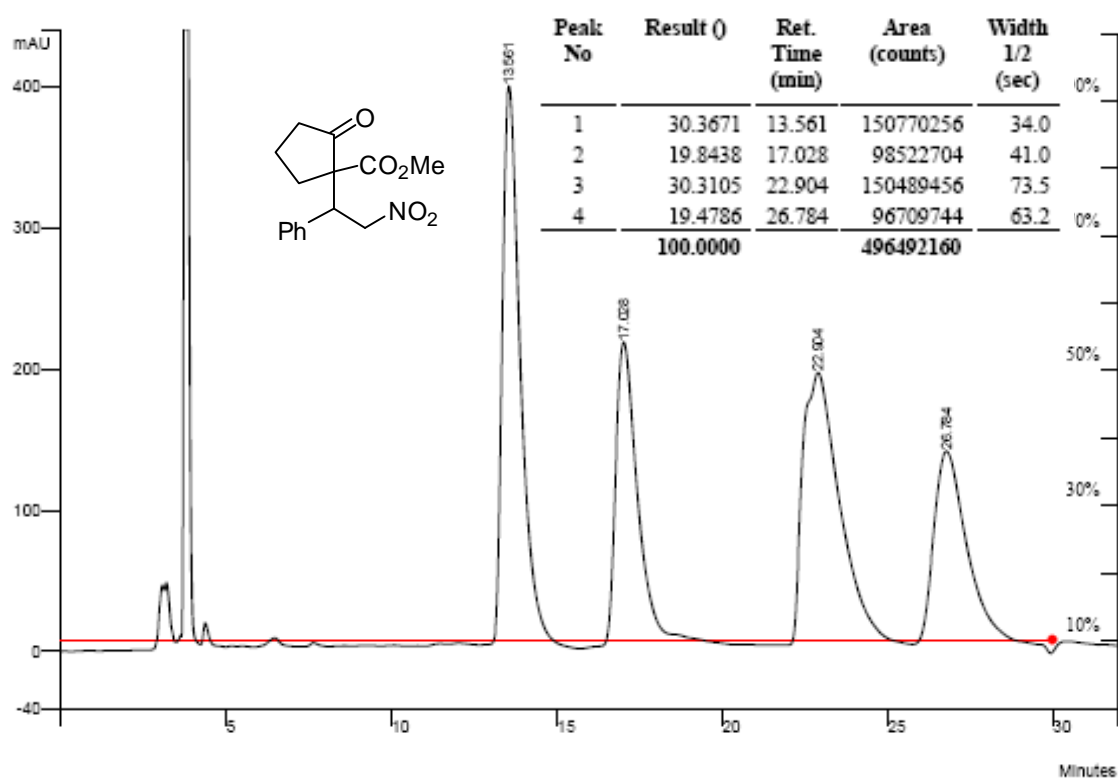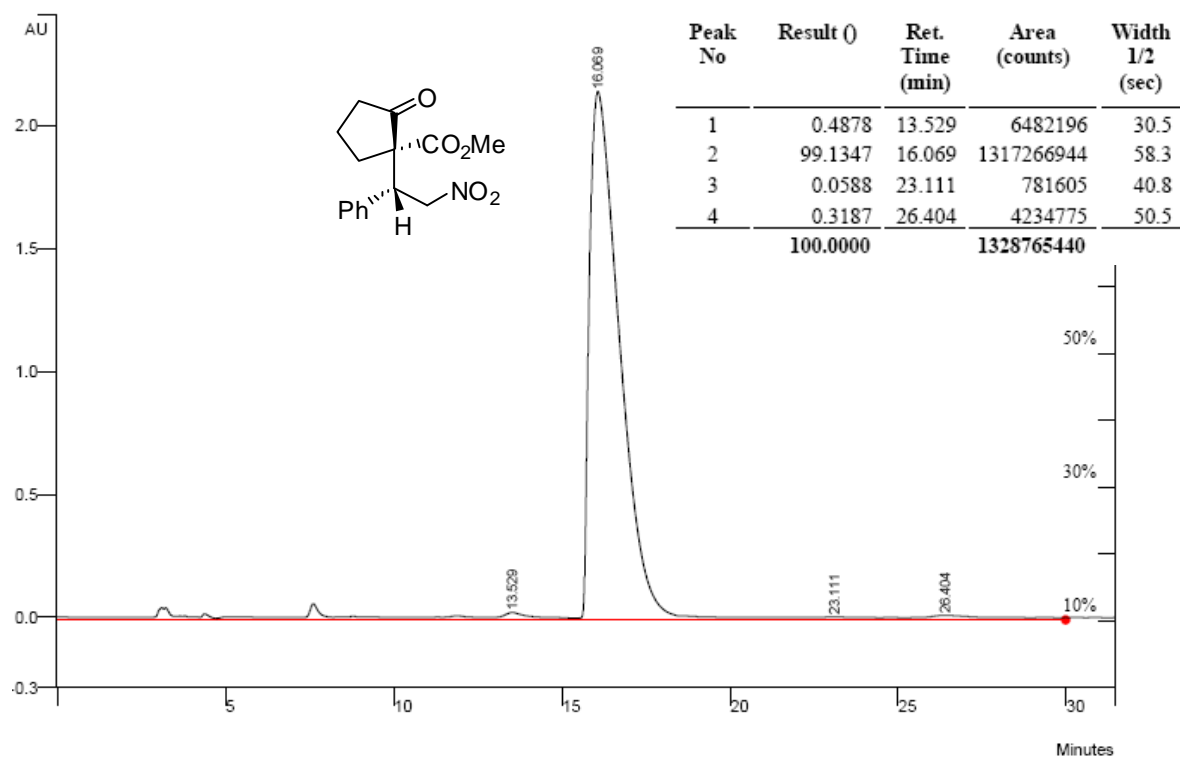

**5h (Entry 16, Table 3)**

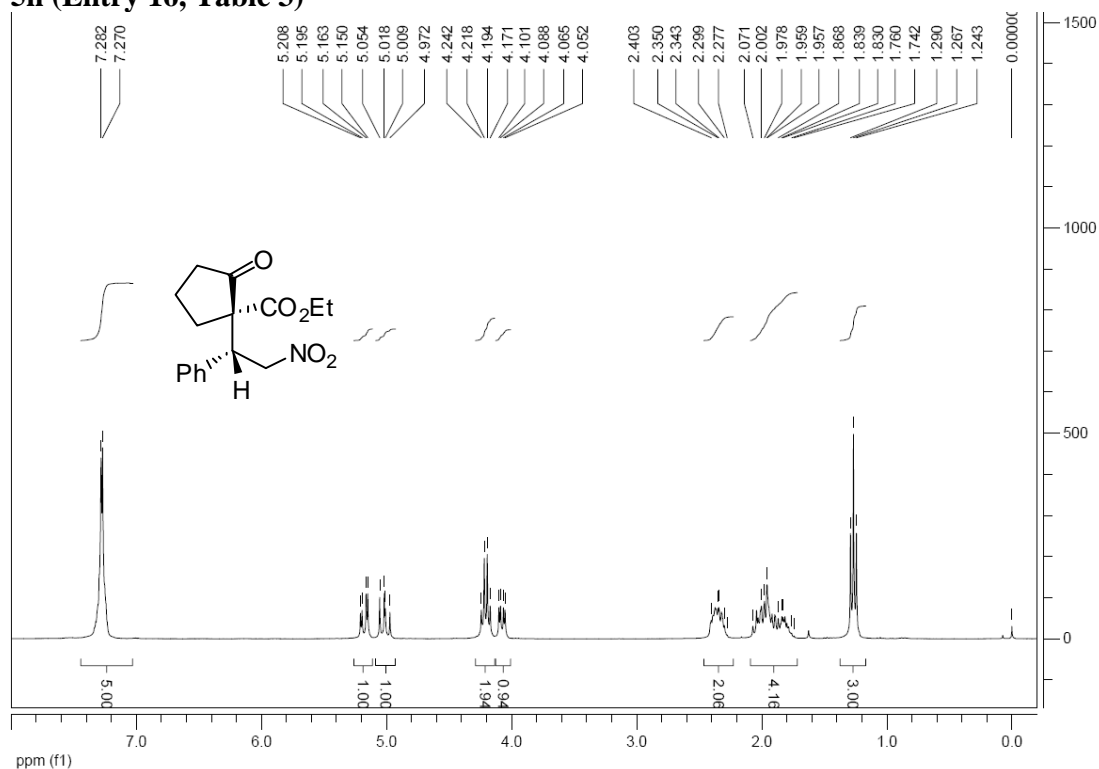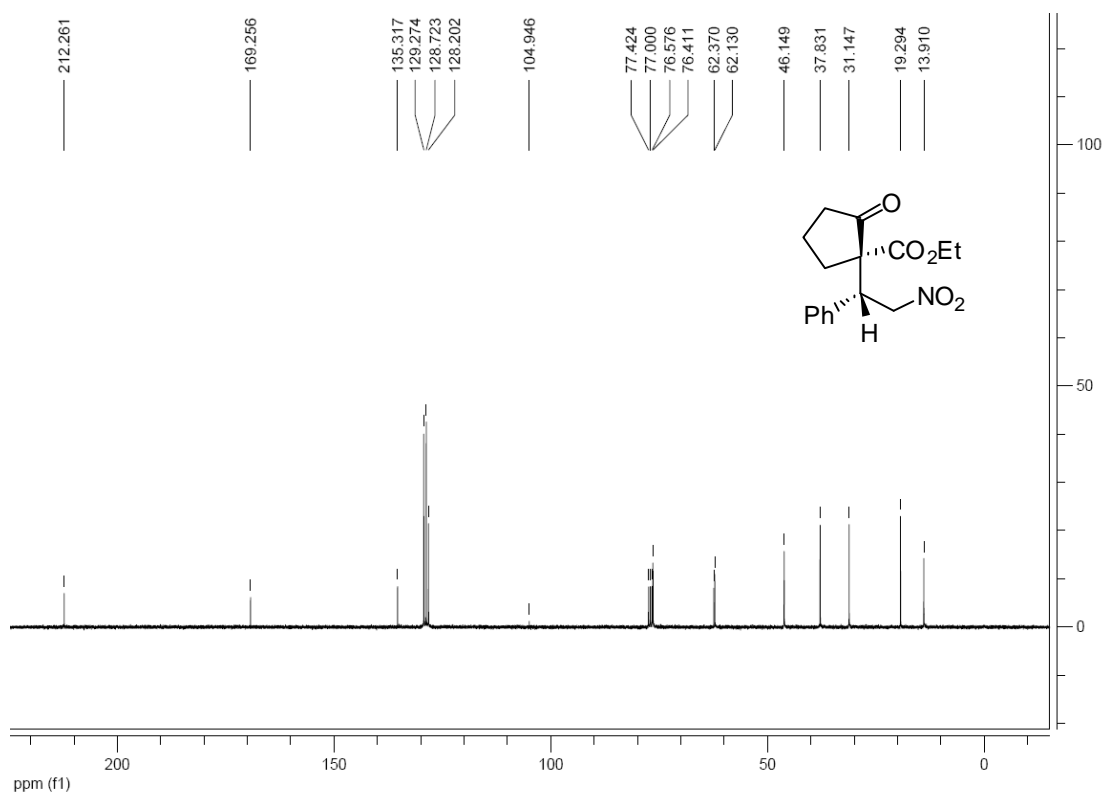

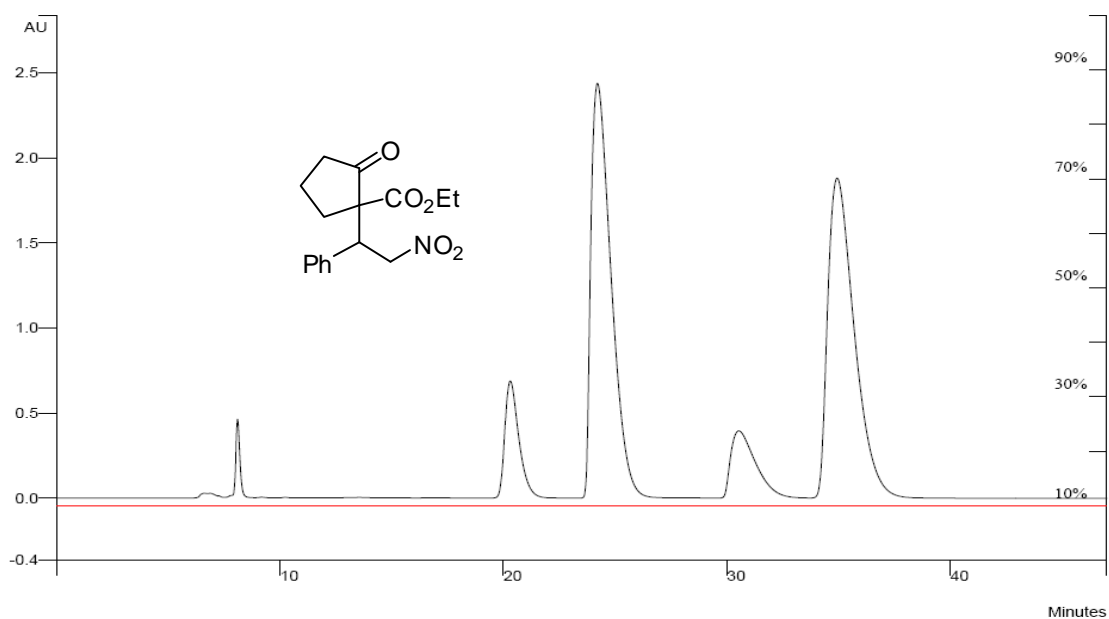

| Peak No       | Peak Name | Result ()      | Ret. Time (min) | Time Offset (min) | Area (counts)     | Rel Ret Time | Sep. Code | Width 1/2 (sec) | Status Codes | Group |
|---------------|-----------|----------------|-----------------|-------------------|-------------------|--------------|-----------|-----------------|--------------|-------|
| 1             |           | 8.1695         | 20.309          | 0.000             | 300867264         | 0.00         | BB        | 39.7            |              | 0     |
| 2             |           | 41.5159        | 24.211          | 0.000             | 1528955136        | 0.00         | BB        | 59.3            |              | 0     |
| 3             |           | 8.1995         | 30.538          | 0.000             | 301974016         | 0.00         | BB        | 72.2            |              | 0     |
| 4             |           | 42.1150        | 34.940          | 0.000             | 1551018112        | 0.00         | BB        | 76.5            |              | 0     |
| <b>Totals</b> |           | <b>99.9999</b> |                 | <b>0.000</b>      | <b>3682814464</b> |              |           |                 |              |       |

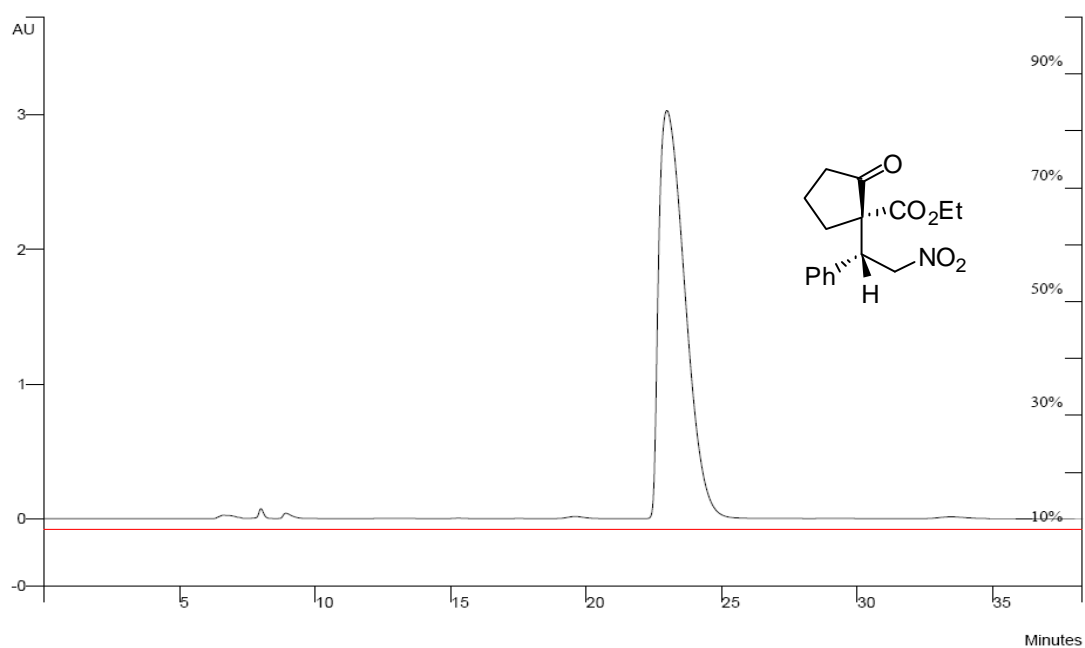

| Peak No       | Peak Name | Result ()       | Ret. Time (min) | Time Offset (min) | Area (counts)     | Rel Ret Time | Sep. Code | Width 1/2 (sec) | Status Codes | Group |
|---------------|-----------|-----------------|-----------------|-------------------|-------------------|--------------|-----------|-----------------|--------------|-------|
| 1             |           | 0.3494          | 19.593          | 0.000             | 7198742           | 0.00         | BB        | 39.3            |              | 0     |
| 2             |           | 99.0946         | 22.980          | 0.000             | 2041376768        | 0.00         | BB        | 64.5            |              | 0     |
| 3             |           | 0.0598          | 29.227          | 0.000             | 1231525           | 0.00         | BB        | 49.8            |              | 0     |
| 4             |           | 0.4962          | 33.468          | 0.000             | 10220963          | 0.00         | BB        | 66.7            |              | 0     |
| <b>Totals</b> |           | <b>100.0000</b> |                 | <b>0.000</b>      | <b>2060027904</b> |              |           |                 |              |       |

## 7. Scale-up Experiment

2,4-Pentanedione (**2**, 10.3 mL, 100 mmol) was added to a mixture of  $\beta$ -nitrostyrene (**1a**, 7.5 g, 50 mmol) and **QN-SQA** (160 mg, 0.5 mol%) in brine (150 mL of saturated NaCl aqueous solution). The reaction mixture was mixed vigorously at 25°C. After completion of the reaction, an aqueous HCl solution (1 N, 20 mL) was added to quench the reaction. The reaction mixture was filtered and washed with water to afford the Michael addition product **3a** (11.9 g; 95 % yield; >99%ee(*S*)).

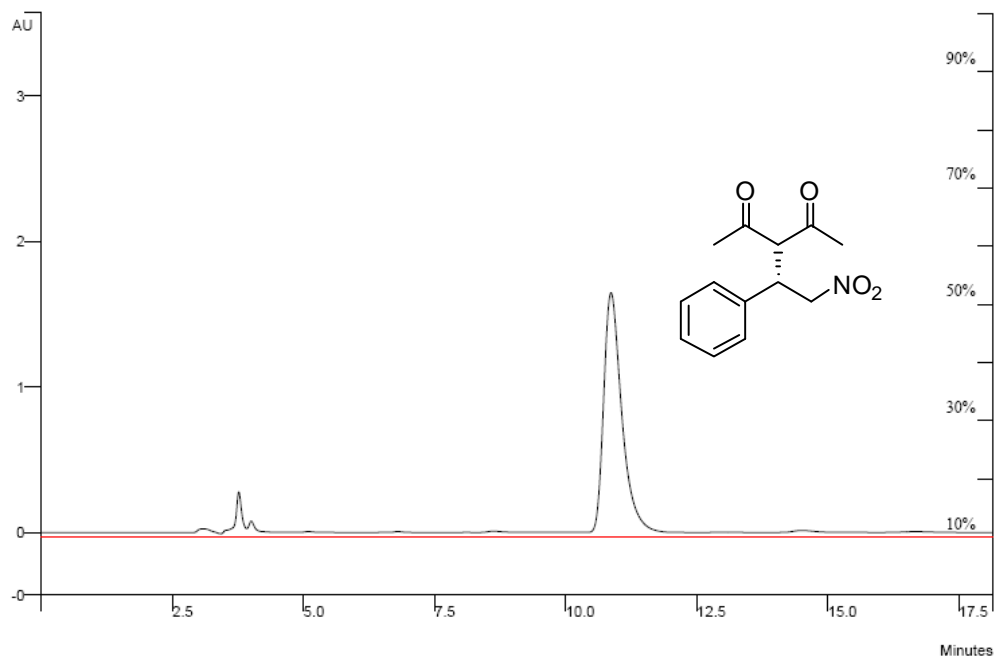

| Peak No | Peak Name | Result () | Ret. Time (min) | Time Offset (min) | Area (counts) | Rel Ret Time | Sep. Code | Width 1/2 (sec) | Status Codes | Group |
|---------|-----------|-----------|-----------------|-------------------|---------------|--------------|-----------|-----------------|--------------|-------|
| 1       |           | 99.6378   | 10.869          | 0.000             | 395962688     | 0.00         | BB        | 21.3            |              | 0     |
| 2       |           | 0.3622    | 14.513          | 0.000             | 1439543       | 0.00         | BB        | 18.5            |              | 0     |
| Totals  |           | 100.0000  |                 | 0.000             | 397402240     |              |           |                 |              |       |

## 8. References

1. (a) S. H. McCooey and S. J. Connon, *Angew. Chem. Int. Ed.*, 2005, **44**, 6367-6370.; (b) S. H. Oh, H. S. Rho, J. W. Lee, J. E. Lee, S. H. Youk, J. Chin and C. E. Song, *Angew. Chem. Int. Ed.*, 2008, **47**, 7872 –7875.; (c) J. P. Malerich, K. Hagihara and V. H. Rawal, *J. Am. Chem. Soc.*, 2008, **130**, 14416-14417.; (d) H. Jiang, M. W. Paixão, D. Monge and K. A. Jørgensen, *J. Am. Chem. Soc.*, 2010, **132**, 2775-2783.
2. D. Evans, S. Mito, and D. Seidel, *J. Am. Chem. Soc.*, 2007, **129**, 11583-11592.
3. J. Wang, H. Li, W. Duan, L. Zu and W. Wang, *Org. Lett.*, 2005, **7**, 4713-4716.
4. C. Wang, Z. Zhang, X. Dong and X. Wu, *Chem. Commun.*, 2008, 1431-1433.
5. X. Jiang, Y. Zhang, X. Liu, G. Zhang, L. Lai, L. Wu, J. Zhang and R. Wang, *J. Org. Chem.*, 2009, **74**, 5562-5567.
6. Z. Zhang, X. Dong, D. Chen and C. Wang, *Chem. Eur. J.*, 2008, **14**, 8780-8783.
7. J. Luo, L. Xu, R. A. S. Hay and Y. Lu, *Org. Lett.*, 2009, **11**, 437-440.
